# Supplementary material for: Two locus inheritance of non-syndromic midline craniosynostosis via rare SMAD6 and common BMP2 alleles
Source: eLife. 2016 Sep 8;5:e20125. doi: 10.7554/eLife.20125 (PMC5045293; doi:10.7554/eLife.20125)
Supplement: Supplementary file 2. — Exome sequencing quality statistics for all members of craniosynostosis kindreds (n = 455) and autism controls (n = 3337) . DOI: http://dx.doi.org/10.7554/eLife.20125.024 [file elife-20125-supp2.xlsx]

## Sheet: 455 CSO Exome Metrics
SUBJECT	Read Length:	Num reads (M):	Num bases (G):	Mean coverage:	Median coverage:	PCR duplicates:	Multiply mapped:	Unmapped:	Reads on-target:	Bases on-target:	Mean error rate:	1x target base coverage:	2x target base coverage:	4x target base coverage:	8x target base coverage:	10x target base coverage:	15x target base coverage:	20x target base coverage:	30x target base coverage:	40x target base coverage:	50x target base coverage:	100x target base coverage:
1	74	74.2	5.5	47.5	42	0.1323	0.0692	0.0009	0.4617	0.3777	0.0022	0.976	0.971	0.965	0.952	0.943	0.909	0.858	0.714	0.546	0.389	0.048
2	74	86.1	6.4	90.7	75	0.0717	0.059	0.0037	0.7192	0.6183	0.0025	0.989	0.986	0.98	0.968	0.961	0.94	0.914	0.848	0.772	0.693	0.357
3	74	85.4	6.3	92.5	75	0.0763	0.0602	0.0019	0.7298	0.636	0.0029	0.988	0.984	0.978	0.965	0.958	0.935	0.907	0.838	0.761	0.682	0.359
4	74	73.2	5.4	47.8	42	0.1174	0.0778	0.0036	0.4687	0.3849	0.0024	0.976	0.971	0.965	0.952	0.942	0.906	0.853	0.707	0.541	0.387	0.052
5	74	82	6.1	86.2	73	0.0794	0.0591	0.0043	0.718	0.6175	0.0021	0.988	0.985	0.979	0.966	0.959	0.937	0.909	0.841	0.763	0.681	0.334
6	74	90.8	6.7	32.7	30	0.1656	0.0437	0.3627	0.2617	0.2121	0.0026	0.974	0.969	0.962	0.94	0.922	0.856	0.759	0.516	0.298	0.153	0.009
7	74	82.9	6.1	87.3	73	0.0793	0.0612	0.0044	0.7176	0.6189	0.0025	0.988	0.984	0.978	0.965	0.958	0.935	0.907	0.839	0.761	0.68	0.341
8	74	80.4	5.9	52.3	46	0.1156	0.0796	0.0015	0.4684	0.3844	0.0025	0.977	0.971	0.966	0.955	0.947	0.917	0.874	0.749	0.598	0.45	0.071
9	74	75.9	5.6	48.6	43	0.1074	0.0769	0.0014	0.4633	0.3778	0.0027	0.977	0.971	0.966	0.953	0.943	0.909	0.857	0.714	0.549	0.397	0.055
10	74	63.5	4.7	58.5	51	0.0558	0.0598	0.0131	0.6424	0.5406	0.0036	0.99	0.987	0.981	0.966	0.955	0.922	0.877	0.765	0.639	0.517	0.136
11	74	67.6	5	62.5	55	0.0601	0.0585	0.0068	0.6583	0.5547	0.003	0.99	0.987	0.981	0.967	0.958	0.928	0.89	0.79	0.674	0.558	0.164
12	74	71.2	5.3	67.4	59	0.0621	0.0606	0.0055	0.6615	0.5561	0.0035	0.99	0.987	0.982	0.969	0.961	0.936	0.902	0.813	0.708	0.6	0.2
13	74	75	5.5	62.1	46	0.1806	0.0763	0.0178	0.5506	0.4956	0.0033	0.986	0.982	0.97	0.936	0.915	0.856	0.793	0.67	0.56	0.466	0.185
14	74	62	4.6	58	51	0.056	0.0627	0.0056	0.6546	0.5492	0.0028	0.99	0.987	0.981	0.966	0.956	0.923	0.879	0.768	0.642	0.518	0.13
15	74	67.9	5	62.5	55	0.0574	0.0607	0.0247	0.6439	0.5408	0.0037	0.99	0.987	0.982	0.968	0.959	0.93	0.892	0.792	0.676	0.56	0.163
16	74	55.3	4.1	52.1	45	0.0459	0.0611	0.0107	0.6663	0.553	0.0049	0.99	0.986	0.978	0.955	0.941	0.894	0.835	0.7	0.565	0.443	0.102
17	74	56.1	4.2	53.4	44	0.0742	0.0602	0.0033	0.6624	0.5592	0.0027	0.99	0.986	0.977	0.952	0.935	0.883	0.82	0.685	0.556	0.444	0.121
18	74	97.1	7.2	90.1	75	0.0632	0.0593	0.0355	0.6492	0.545	0.0032	0.991	0.988	0.983	0.971	0.965	0.943	0.916	0.847	0.768	0.687	0.354
19	74	72.7	5.4	70.3	58	0.0726	0.0596	0.0064	0.6854	0.5809	0.0027	0.989	0.986	0.979	0.962	0.951	0.918	0.876	0.779	0.677	0.58	0.236
20	74	51.3	3.8	49.4	41	0.0625	0.0598	0.0108	0.6847	0.5785	0.0032	0.988	0.984	0.973	0.944	0.926	0.867	0.799	0.654	0.52	0.405	0.096
21	74	78	5.8	72.2	63	0.0638	0.0616	0.0126	0.6605	0.5558	0.0034	0.991	0.988	0.983	0.972	0.965	0.943	0.913	0.833	0.736	0.633	0.236
22	74	61.2	4.5	59.1	51	0.0636	0.0644	0.0076	0.6744	0.5675	0.0034	0.99	0.987	0.981	0.965	0.954	0.92	0.874	0.76	0.635	0.516	0.144
23	74	63.6	4.7	62.4	54	0.0655	0.0638	0.0123	0.6787	0.5764	0.0026	0.99	0.987	0.981	0.966	0.956	0.925	0.883	0.779	0.663	0.549	0.167
24	74	50.2	3.7	46.4	41	0.0601	0.0581	0.0275	0.6597	0.554	0.0036	0.99	0.986	0.977	0.955	0.939	0.888	0.822	0.669	0.515	0.382	0.06
25	74	52.3	3.9	48.9	42	0.0513	0.06	0.0089	0.6608	0.5499	0.0034	0.99	0.986	0.978	0.957	0.942	0.895	0.833	0.688	0.541	0.412	0.076
26	74	68.2	5	66.3	58	0.057	0.0632	0.0067	0.6798	0.5709	0.0034	0.99	0.987	0.982	0.968	0.959	0.932	0.895	0.803	0.696	0.587	0.194
27	74	60.4	4.5	58.6	51	0.0558	0.0624	0.0103	0.6775	0.5696	0.003	0.99	0.987	0.98	0.963	0.953	0.918	0.873	0.761	0.638	0.518	0.138
28	74	84.6	6.3	81.9	62	0.0905	0.0654	0.0179	0.6603	0.5689	0.0026	0.984	0.978	0.963	0.928	0.91	0.861	0.813	0.724	0.645	0.575	0.316
29	74	54.5	4	56.6	48	0.0626	0.0594	0.003	0.7302	0.624	0.0021	0.987	0.982	0.973	0.951	0.937	0.895	0.843	0.725	0.603	0.489	0.135
30	74	72.9	5.4	76.7	64	0.0702	0.06	0.0021	0.7301	0.6312	0.0021	0.988	0.985	0.978	0.963	0.955	0.928	0.895	0.814	0.722	0.629	0.272
31	74	95.3	7	60	53	0.1005	0.0779	0.0044	0.4663	0.3823	0.0023	0.977	0.972	0.967	0.958	0.952	0.931	0.899	0.802	0.676	0.542	0.113
32	74	74.4	5.5	76.7	64	0.0812	0.058	0.0032	0.7198	0.6188	0.002	0.988	0.984	0.977	0.962	0.952	0.925	0.891	0.809	0.719	0.627	0.275
33	74	100.1	7.4	57.6	51	0.1393	0.0727	0.0081	0.4322	0.3501	0.0026	0.978	0.972	0.967	0.957	0.95	0.927	0.893	0.792	0.659	0.52	0.1
34	74	90.7	6.7	95.2	77	0.0819	0.0601	0.0029	0.7227	0.6302	0.0026	0.987	0.984	0.977	0.963	0.955	0.932	0.904	0.837	0.764	0.688	0.376
35	74	70.6	5.2	45	39	0.1154	0.0749	0.0019	0.4735	0.3871	0.0025	0.975	0.97	0.964	0.949	0.938	0.896	0.836	0.675	0.5	0.346	0.042
36	74	84.7	6.3	52.3	46	0.1136	0.0777	0.0018	0.4603	0.3751	0.0025	0.977	0.971	0.967	0.956	0.949	0.921	0.878	0.753	0.6	0.45	0.07
37	74	53.8	4	35.6	31	0.0925	0.0704	0.0008	0.4908	0.4014	0.0023	0.974	0.968	0.961	0.936	0.918	0.852	0.759	0.538	0.339	0.198	0.02
38	74	75.5	5.6	49.2	43	0.1267	0.0693	0.0012	0.4682	0.3844	0.0025	0.976	0.971	0.965	0.953	0.944	0.911	0.862	0.724	0.561	0.408	0.056
39	74	103.8	7.7	60.1	53	0.1333	0.074	0.0042	0.4359	0.3514	0.0057	0.978	0.973	0.969	0.96	0.955	0.935	0.904	0.81	0.683	0.546	0.113
40	74	65.8	4.9	41.2	36	0.0817	0.0813	0.0015	0.4566	0.3698	0.008	0.976	0.97	0.964	0.945	0.932	0.882	0.812	0.63	0.443	0.289	0.03
41	74	74.1	5.5	46.9	42	0.1329	0.071	0.001	0.4576	0.3735	0.0024	0.976	0.971	0.966	0.953	0.944	0.91	0.859	0.711	0.537	0.376	0.044
42	74	58.2	4.3	38.1	34	0.1191	0.0689	0.0011	0.4723	0.3863	0.0025	0.975	0.969	0.963	0.943	0.929	0.874	0.793	0.588	0.389	0.236	0.024
43	67	97.6	6.5	51.1	45	0.132	0.0756	0.0012	0.4305	0.3512	0.0022	0.977	0.972	0.967	0.956	0.948	0.919	0.874	0.746	0.588	0.435	0.065
44	67	103.8	7	54.8	49	0.1321	0.079	0.0044	0.4216	0.3441	0.0022	0.978	0.973	0.968	0.959	0.952	0.928	0.891	0.779	0.635	0.487	0.082
45	74	72.2	5.3	46.9	41	0.1196	0.0743	0.0011	0.4671	0.3837	0.0025	0.976	0.97	0.964	0.95	0.939	0.902	0.848	0.699	0.531	0.376	0.047
46	74	75.3	5.6	49.2	43	0.1165	0.0723	0.0012	0.4705	0.386	0.0025	0.976	0.971	0.966	0.953	0.944	0.912	0.864	0.726	0.564	0.409	0.055
47	74	81.8	6.1	50.8	45	0.1145	0.076	0.001	0.4615	0.3775	0.0059	0.976	0.97	0.965	0.953	0.944	0.913	0.866	0.734	0.578	0.429	0.064
48	74	103.9	7.7	65.4	58	0.1052	0.0792	0.002	0.4558	0.3715	0.0058	0.978	0.972	0.968	0.961	0.956	0.939	0.913	0.834	0.724	0.6	0.148
49	74	87.8	6.5	53.2	47	0.0882	0.0782	0.0113	0.4448	0.3579	0.0025	0.978	0.972	0.967	0.957	0.95	0.925	0.886	0.767	0.615	0.464	0.073
50	74	61.7	4.6	36.7	33	0.0979	0.0774	0.0246	0.4392	0.3516	0.0075	0.975	0.97	0.964	0.944	0.928	0.87	0.785	0.57	0.365	0.215	0.02
51	67	106.4	7.1	54.4	48	0.1206	0.0755	0.0012	0.4227	0.3422	0.0022	0.979	0.973	0.968	0.959	0.953	0.93	0.894	0.783	0.636	0.483	0.077
52	67	74.6	5	39.3	35	0.1339	0.087	0.0319	0.4165	0.3435	0.002	0.975	0.97	0.963	0.944	0.93	0.876	0.799	0.604	0.412	0.261	0.026
53	74	85	6.3	53.8	47	0.1085	0.0788	0.0028	0.4719	0.3844	0.0093	0.976	0.971	0.967	0.956	0.949	0.922	0.882	0.763	0.616	0.469	0.077
54	74	161.2	11.9	99.2	88	0.1211	0.0765	0.0036	0.446	0.3633	0.0091	0.982	0.975	0.971	0.967	0.964	0.957	0.948	0.919	0.874	0.812	0.414
55	74	50.9	3.8	32.7	28	0.1121	0.0888	0.0479	0.4537	0.3788	0.0092	0.972	0.967	0.957	0.922	0.895	0.806	0.696	0.468	0.285	0.165	0.019
56	74	71.8	5.3	45.6	40	0.1028	0.0764	0.0029	0.4754	0.3857	0.0092	0.975	0.97	0.965	0.95	0.94	0.902	0.845	0.686	0.511	0.355	0.043
57	74	82.9	6.1	46.3	41	0.1751	0.0686	0.1317	0.396	0.3296	0.0032	0.974	0.969	0.964	0.95	0.939	0.898	0.838	0.685	0.517	0.368	0.053
58	74	76.2	5.6	48.6	42	0.1034	0.0809	0.0041	0.4602	0.3765	0.003	0.976	0.971	0.966	0.953	0.944	0.908	0.856	0.71	0.546	0.394	0.057
59	74	70.4	5.2	43.4	37	0.1213	0.0831	0.0337	0.4483	0.3738	0.0028	0.974	0.969	0.963	0.944	0.93	0.88	0.811	0.64	0.465	0.317	0.043
60	74	61.1	4.5	36.3	32	0.0747	0.0743	0.0025	0.4505	0.3608	0.0082	0.976	0.97	0.962	0.939	0.922	0.858	0.769	0.553	0.355	0.212	0.019
61	74	81.8	6.1	50.1	44	0.1116	0.0834	0.0014	0.4478	0.3613	0.0056	0.977	0.972	0.967	0.956	0.948	0.918	0.871	0.736	0.573	0.419	0.059
62	74	75.1	5.6	48.5	42	0.1181	0.0841	0.0058	0.4633	0.381	0.0075	0.976	0.971	0.966	0.954	0.944	0.905	0.848	0.697	0.532	0.384	0.065
63	74	113	8.4	66.6	59	0.0906	0.0747	0.0023	0.4448	0.3578	0.0078	0.98	0.973	0.969	0.962	0.957	0.941	0.918	0.843	0.737	0.615	0.157
64	74	75.9	5.6	47.1	41	0.1006	0.0881	0.0296	0.4429	0.3664	0.009	0.976	0.97	0.965	0.949	0.938	0.896	0.837	0.684	0.518	0.37	0.055
65	74	73.9	5.5	47.2	41	0.0946	0.0831	0.0082	0.4607	0.3767	0.0089	0.976	0.971	0.965	0.952	0.942	0.905	0.851	0.699	0.529	0.375	0.049
66	74	86.7	6.4	54.1	48	0.1032	0.076	0.0046	0.4637	0.3787	0.0089	0.977	0.971	0.967	0.956	0.949	0.924	0.885	0.768	0.622	0.474	0.078
67	74	60.8	4.5	38.4	34	0.0955	0.0819	0.0098	0.4571	0.3723	0.0094	0.975	0.969	0.963	0.943	0.928	0.872	0.792	0.59	0.392	0.241	0.024
68	74	97.1	7.2	61.3	54	0.0998	0.0794	0.0102	0.4592	0.3723	0.0028	0.978	0.972	0.968	0.961	0.956	0.937	0.907	0.815	0.691	0.556	0.12
69	74	115.3	8.5	70	62	0.0963	0.0746	0.0023	0.4572	0.3679	0.0028	0.979	0.973	0.969	0.963	0.959	0.945	0.925	0.859	0.763	0.647	0.181
70	74	89.9	6.7	57.8	51	0.1003	0.0813	0.0013	0.4679	0.3797	0.0029	0.977	0.972	0.967	0.958	0.951	0.928	0.893	0.789	0.655	0.517	0.101
71	74	53	3.9	33.7	30	0.0999	0.0772	0.0356	0.4594	0.3753	0.0076	0.974	0.969	0.961	0.936	0.915	0.84	0.738	0.503	0.303	0.168	0.017
72	74	70.2	5.2	42.2	37	0.0848	0.0815	0.0023	0.4537	0.3658	0.008	0.976	0.97	0.964	0.947	0.934	0.888	0.821	0.644	0.46	0.306	0.032
73	74	106.9	7.9	64.7	56	0.1595	0.0834	0.0042	0.4353	0.3575	0.0056	0.977	0.972	0.968	0.96	0.954	0.933	0.902	0.813	0.7	0.579	0.156
74	74	78.3	5.8	41.3	35	0.1694	0.0627	0.1901	0.3766	0.3189	0.0021	0.973	0.968	0.962	0.939	0.922	0.863	0.787	0.608	0.432	0.292	0.042
75	74	94.4	7	57.5	51	0.1078	0.0765	0.0017	0.4536	0.3705	0.0022	0.978	0.972	0.967	0.956	0.949	0.925	0.889	0.784	0.652	0.515	0.099
76	74	73.2	5.4	44.1	39	0.0961	0.0822	0.0021	0.4399	0.3561	0.0023	0.977	0.972	0.966	0.95	0.938	0.896	0.835	0.668	0.487	0.332	0.038
77	74	92.2	6.8	59.5	52	0.1093	0.0824	0.0023	0.4624	0.3811	0.0022	0.977	0.971	0.967	0.957	0.951	0.928	0.893	0.791	0.663	0.529	0.114
78	74	95.7	7.1	57.9	51	0.0976	0.0731	0.005	0.4532	0.3673	0.0026	0.978	0.972	0.968	0.959	0.954	0.932	0.899	0.797	0.662	0.519	0.099
79	74	59.3	4.4	38.9	33	0.094	0.0904	0.0067	0.4688	0.3866	0.0027	0.974	0.969	0.961	0.937	0.918	0.854	0.768	0.571	0.39	0.253	0.032
80	74	55.2	4.1	36.9	32	0.0898	0.085	0.0097	0.4806	0.3946	0.0022	0.974	0.969	0.962	0.939	0.921	0.855	0.764	0.551	0.358	0.217	0.025
81	74	80.5	6	50.4	44	0.094	0.0758	0.0092	0.4673	0.3795	0.0023	0.977	0.971	0.966	0.954	0.946	0.916	0.87	0.738	0.578	0.426	0.06
82	74	84.6	6.3	55.5	48	0.1044	0.0863	0.0052	0.4705	0.3876	0.0024	0.976	0.971	0.966	0.956	0.949	0.921	0.88	0.765	0.625	0.484	0.091
83	74	131.9	9.8	74.6	67	0.1102	0.0768	0.013	0.423	0.3435	0.0079	0.981	0.974	0.969	0.963	0.96	0.948	0.93	0.874	0.791	0.689	0.224
84	74	70.9	5.2	42.9	38	0.0975	0.0766	0.0009	0.458	0.3677	0.0075	0.976	0.971	0.965	0.949	0.937	0.893	0.829	0.657	0.472	0.315	0.034
85	67	59.3	4	33.3	29	0.1429	0.0922	0.0355	0.4301	0.3662	0.0021	0.972	0.966	0.955	0.918	0.892	0.805	0.7	0.48	0.3	0.178	0.021
86	67	51.9	3.5	28.4	25	0.1081	0.0839	0.0468	0.4316	0.3563	0.0025	0.973	0.967	0.957	0.917	0.886	0.777	0.642	0.381	0.2	0.102	0.012
87	74	67.1	5	42.6	36	0.108	0.0861	0.0128	0.4616	0.3857	0.0024	0.974	0.969	0.962	0.941	0.926	0.871	0.798	0.622	0.449	0.307	0.043
88	74	74.8	5.5	48.1	42	0.0944	0.0873	0.0122	0.4633	0.3795	0.0023	0.976	0.97	0.965	0.952	0.942	0.906	0.853	0.707	0.541	0.389	0.054
89	74	64.9	4.8	42.9	38	0.0928	0.0799	0.0034	0.4781	0.3907	0.0058	0.975	0.97	0.964	0.948	0.937	0.893	0.829	0.655	0.469	0.311	0.035
90	74	81.6	6	53.1	46	0.097	0.0887	0.0073	0.4662	0.3842	0.0023	0.976	0.971	0.966	0.955	0.946	0.915	0.87	0.743	0.593	0.449	0.08
91	74	79	5.8	49.5	43	0.0882	0.0775	0.0013	0.4662	0.3801	0.0027	0.977	0.971	0.965	0.952	0.943	0.91	0.862	0.724	0.563	0.411	0.058
92	74	82.4	6.1	51.8	45	0.1027	0.0818	0.0068	0.4534	0.371	0.0027	0.977	0.971	0.967	0.955	0.947	0.916	0.869	0.738	0.585	0.438	0.072
93	74	98.7	7.3	48.9	41	0.2598	0.0554	0.14	0.3509	0.2913	0.0026	0.975	0.971	0.968	0.957	0.947	0.909	0.85	0.694	0.524	0.377	0.08
94	74	108.7	8	66.8	58	0.1016	0.0737	0.002	0.4606	0.3733	0.0022	0.979	0.973	0.969	0.962	0.957	0.941	0.916	0.837	0.728	0.607	0.161
95	74	100.2	7.4	64.7	55	0.1211	0.0785	0.0039	0.462	0.3811	0.0024	0.978	0.973	0.969	0.961	0.955	0.934	0.902	0.808	0.69	0.565	0.153
96	74	44.8	3.3	27.5	23	0.1113	0.0888	0.055	0.438	0.3623	0.0056	0.972	0.966	0.953	0.901	0.862	0.738	0.597	0.348	0.188	0.103	0.014
97	74	82.9	6.1	50.5	45	0.0827	0.0779	0.0018	0.4566	0.3706	0.0081	0.977	0.971	0.966	0.954	0.945	0.914	0.868	0.736	0.579	0.428	0.062
98	74	90.6	6.7	56.4	50	0.0822	0.0827	0.0028	0.454	0.3678	0.0082	0.978	0.973	0.968	0.959	0.953	0.929	0.893	0.784	0.645	0.502	0.092
99	67	74.6	5	39.2	35	0.1047	0.0818	0.0088	0.4315	0.3523	0.0023	0.976	0.97	0.963	0.943	0.929	0.875	0.798	0.602	0.407	0.255	0.025
100	74	72.9	5.4	39.9	33	0.1278	0.0832	0.0307	0.4104	0.3329	0.0093	0.975	0.969	0.96	0.932	0.911	0.841	0.752	0.559	0.39	0.264	0.041
101	74	91.6	6.8	58	51	0.1157	0.0803	0.002	0.4593	0.3738	0.009	0.977	0.972	0.967	0.958	0.952	0.929	0.896	0.795	0.663	0.523	0.099
102	74	50.7	3.7	28.4	25	0.1364	0.0789	0.1339	0.3965	0.3308	0.0089	0.971	0.965	0.953	0.907	0.873	0.762	0.632	0.385	0.211	0.112	0.012
103	74	104.1	7.7	63.7	56	0.1134	0.0755	0.0015	0.4572	0.3719	0.0093	0.978	0.972	0.968	0.959	0.954	0.935	0.907	0.821	0.705	0.578	0.139
104	74	82.5	6.1	51.4	45	0.1153	0.0845	0.002	0.4505	0.368	0.0024	0.977	0.971	0.966	0.954	0.946	0.914	0.868	0.737	0.583	0.436	0.068
105	74	78.9	5.8	49.2	44	0.1251	0.0684	0.0238	0.4609	0.3768	0.0089	0.975	0.97	0.965	0.952	0.943	0.911	0.864	0.729	0.567	0.413	0.055
106	74	102	7.5	62	54	0.0978	0.0796	0.0038	0.4521	0.3712	0.0024	0.978	0.972	0.968	0.959	0.953	0.931	0.899	0.803	0.681	0.552	0.132
107	74	48.1	3.6	16.3	14	0.163	0.0463	0.4095	0.2378	0.1997	0.0021	0.967	0.956	0.922	0.798	0.717	0.499	0.313	0.105	0.035	0.014	0
108	67	70.6	4.7	39.7	35	0.1036	0.0855	0.0148	0.4448	0.3667	0.0023	0.975	0.97	0.964	0.945	0.931	0.877	0.799	0.603	0.411	0.261	0.029
109	67	106.7	7.2	55.4	49	0.1096	0.0817	0.0045	0.4258	0.3479	0.0023	0.979	0.973	0.968	0.958	0.952	0.928	0.89	0.778	0.635	0.489	0.086
110	74	54.8	4.1	34.9	30	0.0391	0.082	0.0018	0.4672	0.3762	0.0027	0.976	0.971	0.963	0.939	0.92	0.847	0.746	0.517	0.322	0.187	0.021
111	74	69	5.1	38.4	33	0.102	0.081	0.027	0.4105	0.3293	0.0036	0.976	0.971	0.963	0.941	0.925	0.866	0.782	0.579	0.389	0.246	0.025
112	74	107.9	8	60.5	53	0.0978	0.0787	0.0199	0.4235	0.3419	0.0026	0.979	0.973	0.969	0.96	0.954	0.933	0.902	0.807	0.681	0.547	0.12
113	74	89.1	6.6	55.3	48	0.0928	0.0821	0.0025	0.4521	0.3665	0.0024	0.978	0.972	0.968	0.958	0.951	0.925	0.887	0.772	0.629	0.485	0.087
114	74	91.8	6.8	55.8	50	0.1476	0.0714	0.0143	0.4481	0.3685	0.0023	0.976	0.97	0.965	0.954	0.946	0.921	0.884	0.777	0.641	0.501	0.089
115	74	129.6	9.6	81.3	72	0.1085	0.0811	0.0072	0.4521	0.3704	0.0075	0.98	0.974	0.97	0.965	0.962	0.952	0.937	0.889	0.817	0.726	0.271
116	74	77.9	5.8	47.4	42	0.1315	0.0814	0.0095	0.4419	0.3595	0.0061	0.976	0.971	0.966	0.954	0.945	0.909	0.856	0.705	0.534	0.379	0.051
117	74	75.1	5.6	44.1	39	0.1024	0.0757	0.0061	0.445	0.3575	0.0024	0.977	0.972	0.967	0.952	0.941	0.899	0.837	0.667	0.485	0.331	0.039
118	74	85.9	6.4	52.3	46	0.1042	0.0768	0.0046	0.4453	0.3593	0.0024	0.975	0.969	0.963	0.952	0.944	0.917	0.876	0.754	0.602	0.452	0.07
119	74	75.8	5.6	46.4	40	0.086	0.0864	0.0158	0.4447	0.3612	0.003	0.977	0.971	0.966	0.953	0.943	0.905	0.848	0.691	0.517	0.362	0.048
120	74	110.5	8.2	68.6	60	0.1093	0.0758	0.0072	0.4523	0.3664	0.0022	0.979	0.974	0.97	0.963	0.959	0.944	0.921	0.847	0.743	0.624	0.174
121	74	92.2	6.8	55.9	49	0.1105	0.0789	0.0019	0.4518	0.3686	0.0022	0.977	0.972	0.967	0.956	0.949	0.924	0.886	0.775	0.635	0.493	0.089
122	74	83.9	6.2	55	48	0.0848	0.0847	0.0037	0.4664	0.3871	0.0085	0.977	0.971	0.966	0.954	0.946	0.917	0.875	0.759	0.619	0.479	0.088
123	74	69.9	5.2	43.1	37	0.1107	0.0879	0.0115	0.4543	0.3769	0.0059	0.974	0.969	0.963	0.945	0.93	0.879	0.808	0.633	0.458	0.312	0.042
124	74	105.3	7.8	64.2	56	0.1399	0.0772	0.029	0.4425	0.3699	0.0022	0.977	0.971	0.967	0.958	0.952	0.93	0.898	0.809	0.697	0.575	0.147
125	74	72.8	5.4	46.2	40	0.1156	0.0841	0.0101	0.4525	0.374	0.0025	0.976	0.971	0.966	0.952	0.941	0.9	0.841	0.683	0.511	0.358	0.05
126	74	84	6.2	52.2	46	0.1264	0.0841	0.0134	0.4584	0.3774	0.009	0.976	0.971	0.966	0.954	0.946	0.915	0.87	0.744	0.593	0.445	0.073
127	67	74.1	5	39.6	35	0.1114	0.0863	0.0153	0.4349	0.358	0.0023	0.975	0.97	0.963	0.943	0.929	0.875	0.797	0.604	0.413	0.262	0.027
128	67	90.9	6.1	48.1	43	0.1017	0.0837	0.0033	0.4244	0.3451	0.0025	0.978	0.972	0.967	0.954	0.945	0.913	0.864	0.722	0.551	0.393	0.05
129	74	87.7	6.5	56.4	47	0.1541	0.088	0.015	0.4507	0.3789	0.0026	0.975	0.97	0.965	0.953	0.944	0.912	0.866	0.745	0.608	0.474	0.108
130	74	69.4	5.1	41.8	36	0.1273	0.0781	0.0032	0.448	0.3659	0.0024	0.973	0.967	0.959	0.938	0.923	0.868	0.794	0.614	0.438	0.297	0.041
131	74	81.8	6.1	52.9	46	0.0995	0.085	0.002	0.4655	0.3817	0.0038	0.976	0.971	0.966	0.955	0.947	0.917	0.874	0.75	0.601	0.455	0.075
132	74	65.5	4.8	35.3	32	0.2299	0.0692	0.0966	0.3797	0.3171	0.0025	0.973	0.969	0.963	0.941	0.924	0.861	0.775	0.564	0.358	0.206	0.013
133	74	85.6	6.3	53.3	47	0.1145	0.0779	0.0018	0.4638	0.3777	0.009	0.976	0.971	0.967	0.956	0.948	0.921	0.88	0.758	0.609	0.461	0.075
134	74	67.6	5	43.7	37	0.1089	0.0896	0.0063	0.463	0.3818	0.003	0.975	0.97	0.964	0.947	0.934	0.884	0.813	0.638	0.462	0.318	0.047
135	74	69.4	5.1	46.8	41	0.1085	0.0815	0.009	0.4835	0.3982	0.0092	0.975	0.97	0.965	0.951	0.94	0.902	0.845	0.694	0.524	0.37	0.05
136	74	82.3	6.1	51.8	45	0.1105	0.0795	0.0054	0.4636	0.3823	0.0058	0.976	0.971	0.965	0.953	0.945	0.913	0.867	0.738	0.587	0.441	0.071
137	74	72.2	5.3	44.6	38	0.1417	0.0908	0.0106	0.4369	0.3646	0.0026	0.974	0.969	0.963	0.943	0.928	0.875	0.805	0.639	0.473	0.334	0.053
138	74	56.5	4.2	21.5	19	0.2166	0.0485	0.2973	0.2753	0.23	0.0025	0.97	0.964	0.948	0.881	0.83	0.673	0.5	0.226	0.09	0.037	0.001
139	74	73.7	5.5	41.1	36	0.0905	0.0735	0.0026	0.4241	0.3389	0.0043	0.978	0.972	0.966	0.949	0.936	0.887	0.815	0.627	0.436	0.283	0.031
140	74	72.4	5.4	45.4	39	0.0885	0.083	0.0026	0.4551	0.37	0.0024	0.976	0.97	0.964	0.948	0.936	0.894	0.832	0.671	0.498	0.348	0.046
141	74	161.5	12	85.1	74	0.0898	0.0682	0.0092	0.4047	0.3193	0.0029	0.984	0.977	0.973	0.968	0.965	0.956	0.943	0.9	0.832	0.744	0.298
142	74	72.9	5.4	47.8	41	0.1132	0.0839	0.0204	0.4674	0.387	0.0091	0.975	0.97	0.966	0.952	0.941	0.901	0.844	0.691	0.523	0.373	0.06
143	74	72.9	5.4	44.7	39	0.0972	0.0767	0.0065	0.4584	0.3723	0.0061	0.977	0.971	0.965	0.951	0.941	0.901	0.84	0.674	0.494	0.338	0.042
144	74	59.6	4.4	21.5	19	0.1642	0.054	0.3534	0.2588	0.2127	0.0034	0.97	0.963	0.944	0.87	0.817	0.654	0.483	0.226	0.095	0.041	0.003
145	67	78.8	5.3	41.4	37	0.11	0.0805	0.0169	0.4218	0.3426	0.0024	0.976	0.971	0.965	0.949	0.938	0.893	0.827	0.644	0.449	0.289	0.029
146	74	88.2	6.5	54	47	0.0995	0.0789	0.0014	0.4597	0.3724	0.0025	0.977	0.972	0.967	0.957	0.949	0.922	0.879	0.756	0.608	0.464	0.083
147	74	80.7	6	51.7	45	0.1288	0.0871	0.0053	0.4582	0.3784	0.0024	0.976	0.971	0.966	0.954	0.945	0.913	0.865	0.733	0.58	0.433	0.072
148	74	61.7	4.6	35.3	31	0.1101	0.0751	0.034	0.4313	0.348	0.0027	0.972	0.966	0.958	0.934	0.915	0.846	0.75	0.528	0.334	0.197	0.021
149	74	79.7	5.9	48.7	43	0.0931	0.0785	0.0023	0.4595	0.3711	0.0037	0.977	0.972	0.967	0.955	0.946	0.912	0.861	0.716	0.55	0.397	0.056
150	74	80.2	5.9	51.3	45	0.1111	0.0849	0.0085	0.4567	0.3778	0.0023	0.976	0.971	0.966	0.954	0.945	0.912	0.863	0.73	0.576	0.43	0.071
151	74	42.8	3.2	26.9	24	0.0396	0.0799	0.0311	0.4626	0.3711	0.0026	0.974	0.968	0.957	0.917	0.885	0.767	0.62	0.345	0.168	0.081	0.01
152	74	75.8	5.6	47.1	42	0.1038	0.0789	0.0046	0.4637	0.3772	0.0023	0.976	0.971	0.966	0.953	0.944	0.909	0.856	0.707	0.535	0.377	0.047
153	74	79.3	5.9	52.6	45	0.0973	0.0852	0.0068	0.4706	0.3915	0.0023	0.976	0.971	0.966	0.953	0.944	0.91	0.86	0.727	0.576	0.434	0.084
154	74	93.8	6.9	56.2	50	0.1187	0.0784	0.0076	0.4397	0.3535	0.0021	0.978	0.973	0.969	0.96	0.954	0.931	0.897	0.789	0.649	0.503	0.09
155	74	92.5	6.8	53.7	47	0.1044	0.0699	0.0013	0.4414	0.3518	0.0021	0.978	0.973	0.969	0.959	0.952	0.926	0.887	0.767	0.616	0.466	0.078
156	74	107.3	7.9	64.8	57	0.1168	0.0812	0.0018	0.4426	0.3563	0.0021	0.979	0.974	0.97	0.963	0.958	0.941	0.915	0.832	0.719	0.592	0.146
157	74	59.7	4.4	37.1	33	0.1118	0.0688	0.0704	0.4478	0.3664	0.0021	0.974	0.969	0.961	0.939	0.921	0.859	0.773	0.566	0.372	0.227	0.021
158	74	81.9	6.1	49.1	42	0.1382	0.0749	0.0036	0.4454	0.3627	0.0022	0.977	0.972	0.968	0.957	0.948	0.914	0.86	0.712	0.545	0.393	0.065
159	74	68.9	5.1	42.6	37	0.1138	0.088	0.0053	0.4474	0.3652	0.0075	0.975	0.969	0.962	0.94	0.925	0.87	0.798	0.624	0.452	0.312	0.041
160	74	72	5.3	43.7	38	0.0884	0.0662	0.0045	0.461	0.3678	0.0068	0.977	0.97	0.964	0.945	0.932	0.886	0.821	0.652	0.477	0.329	0.04
161	74	55.2	4.1	33.7	29	0.079	0.0771	0.0035	0.462	0.3715	0.0069	0.975	0.969	0.958	0.925	0.9	0.815	0.707	0.484	0.303	0.182	0.018
162	74	61.4	4.5	39	34	0.0858	0.0773	0.0044	0.4667	0.3754	0.0072	0.975	0.969	0.961	0.938	0.92	0.859	0.777	0.581	0.398	0.257	0.027
163	74	67.8	5	41.6	37	0.0816	0.073	0.0054	0.4551	0.3627	0.0075	0.977	0.971	0.964	0.946	0.932	0.884	0.815	0.634	0.447	0.295	0.032
164	74	94.1	7	54	48	0.1115	0.0657	0.0099	0.4254	0.3384	0.0023	0.98	0.975	0.97	0.961	0.955	0.932	0.895	0.781	0.63	0.476	0.075
165	74	69.5	5.1	40.1	35	0.1152	0.0665	0.0583	0.4175	0.3403	0.0022	0.978	0.972	0.965	0.945	0.93	0.873	0.794	0.6	0.415	0.269	0.031
166	74	74.8	5.5	42.5	38	0.107	0.0702	0.0444	0.4175	0.3353	0.0024	0.979	0.973	0.967	0.953	0.942	0.899	0.835	0.656	0.465	0.304	0.032
167	74	99.3	7.3	58.1	51	0.1136	0.0668	0.0037	0.4383	0.3546	0.0022	0.981	0.975	0.971	0.962	0.956	0.934	0.9	0.795	0.66	0.519	0.101
168	74	67.8	5	42.8	38	0.1163	0.0766	0.0184	0.458	0.3728	0.0057	0.976	0.971	0.966	0.951	0.939	0.895	0.83	0.658	0.473	0.315	0.034
169	74	67.3	5	43.1	37	0.0985	0.0835	0.0086	0.4638	0.3784	0.005	0.976	0.97	0.962	0.942	0.928	0.877	0.808	0.637	0.464	0.32	0.04
170	74	71	5.3	44.7	39	0.0823	0.0742	0.0034	0.4738	0.3827	0.0053	0.977	0.971	0.965	0.948	0.937	0.895	0.834	0.671	0.494	0.341	0.041
171	74	69.6	5.2	45.9	40	0.0961	0.0797	0.0082	0.4755	0.3894	0.0054	0.976	0.97	0.963	0.946	0.934	0.89	0.83	0.675	0.508	0.362	0.048
172	74	75.9	5.6	48.9	43	0.0951	0.076	0.0115	0.4682	0.3806	0.0056	0.977	0.971	0.966	0.952	0.942	0.907	0.856	0.716	0.555	0.405	0.057
173	74	87.6	6.5	53.1	47	0.0874	0.0742	0.005	0.4581	0.3684	0.0051	0.978	0.972	0.967	0.956	0.947	0.919	0.877	0.755	0.605	0.459	0.077
174	74	67.5	5	41.6	36	0.0775	0.0715	0.0057	0.4543	0.3637	0.006	0.977	0.971	0.964	0.946	0.932	0.883	0.814	0.632	0.446	0.294	0.032
175	74	57.3	4.2	32.9	28	0.1099	0.0814	0.1044	0.4121	0.3392	0.0021	0.973	0.967	0.957	0.922	0.896	0.809	0.701	0.475	0.292	0.17	0.018
176	74	73.9	5.5	43.4	37	0.1139	0.0897	0.0154	0.4386	0.3588	0.0021	0.975	0.97	0.964	0.944	0.929	0.877	0.806	0.632	0.459	0.317	0.044
177	74	90.1	6.7	54.2	46	0.1201	0.0877	0.0148	0.4348	0.3554	0.0021	0.977	0.972	0.967	0.954	0.945	0.913	0.866	0.74	0.596	0.459	0.093
178	74	87.2	6.4	51.4	45	0.1108	0.0821	0.0065	0.4314	0.3484	0.0024	0.978	0.973	0.968	0.956	0.947	0.916	0.868	0.734	0.578	0.43	0.071
179	74	108.9	8.1	61.3	54	0.1019	0.0749	0.0035	0.4288	0.3415	0.0022	0.979	0.974	0.97	0.962	0.956	0.937	0.907	0.813	0.688	0.552	0.124
180	74	82.2	6.1	53	46	0.1145	0.0755	0.0146	0.4684	0.3808	0.0063	0.977	0.972	0.967	0.955	0.947	0.916	0.872	0.747	0.598	0.453	0.079
181	74	88.8	6.6	56.8	50	0.1069	0.0752	0.016	0.4675	0.378	0.0056	0.978	0.972	0.967	0.957	0.95	0.926	0.889	0.784	0.648	0.508	0.096
182	74	104.4	7.7	64.4	57	0.1097	0.0742	0.0074	0.4548	0.3649	0.0061	0.979	0.973	0.969	0.96	0.955	0.936	0.909	0.827	0.715	0.59	0.148
183	74	142.4	10.5	77	68	0.1765	0.0731	0.012	0.3985	0.3189	0.0036	0.98	0.975	0.971	0.966	0.963	0.952	0.936	0.883	0.803	0.702	0.236
184	74	85	6.3	38.3	35	0.2608	0.0696	0.0803	0.3285	0.2657	0.0035	0.976	0.972	0.968	0.954	0.942	0.893	0.818	0.616	0.41	0.248	0.019
185	74	74	5.5	45.8	40	0.0964	0.0742	0.015	0.4664	0.3761	0.0036	0.977	0.971	0.965	0.95	0.94	0.901	0.845	0.69	0.516	0.361	0.043
186	74	92.5	6.8	56.8	50	0.0885	0.0726	0.0022	0.4643	0.3729	0.0032	0.979	0.973	0.968	0.958	0.951	0.926	0.891	0.785	0.648	0.506	0.097
187	74	77.2	5.7	50.2	44	0.0857	0.0764	0.0044	0.4753	0.3841	0.0034	0.977	0.972	0.966	0.953	0.944	0.912	0.865	0.732	0.574	0.423	0.061
188	74	68.2	5	46	40	0.1108	0.0774	0.0306	0.4802	0.3979	0.0033	0.975	0.971	0.965	0.951	0.94	0.898	0.838	0.68	0.508	0.356	0.05
189	74	73.9	5.5	48.4	42	0.1027	0.0771	0.0088	0.473	0.3867	0.0037	0.978	0.972	0.968	0.956	0.947	0.912	0.859	0.713	0.546	0.392	0.057
190	74	135.6	10	77.8	68	0.1471	0.0744	0.001	0.4333	0.349	0.0022	0.98	0.974	0.971	0.966	0.962	0.951	0.934	0.878	0.795	0.694	0.243
191	74	138.4	10.2	82.7	72	0.1449	0.0798	0.0048	0.4358	0.3526	0.0022	0.981	0.975	0.971	0.966	0.963	0.954	0.939	0.891	0.819	0.728	0.28
192	74	94.4	7	59.9	53	0.0979	0.0713	0.0051	0.4741	0.3855	0.0034	0.979	0.973	0.968	0.958	0.952	0.93	0.898	0.801	0.675	0.542	0.116
193	74	78.3	5.8	48.4	42	0.0926	0.0661	0.0088	0.4671	0.376	0.0031	0.977	0.971	0.964	0.948	0.937	0.899	0.846	0.703	0.543	0.397	0.059
194	74	75.6	5.6	49.5	43	0.1046	0.082	0.0069	0.4751	0.3865	0.0062	0.977	0.971	0.967	0.954	0.944	0.909	0.858	0.718	0.557	0.409	0.062
195	74	90.3	6.7	22.7	21	0.1571	0.0362	0.4679	0.1865	0.1486	0.002	0.973	0.967	0.954	0.901	0.858	0.709	0.535	0.247	0.099	0.041	0.004
196	74	80.6	6	48.6	43	0.1134	0.0806	0.0103	0.4428	0.3561	0.0045	0.976	0.971	0.965	0.952	0.942	0.908	0.858	0.718	0.553	0.4	0.054
197	74	61.6	4.6	36.4	32	0.1237	0.0804	0.0259	0.4399	0.3599	0.0028	0.974	0.969	0.962	0.936	0.916	0.847	0.753	0.542	0.354	0.217	0.022
198	74	75.3	5.6	45	39	0.1097	0.0846	0.0187	0.4357	0.3527	0.0027	0.976	0.971	0.965	0.95	0.938	0.896	0.834	0.67	0.494	0.343	0.044
199	74	76.6	5.7	46.8	40	0.1611	0.081	0.0141	0.4394	0.3601	0.0022	0.976	0.972	0.968	0.955	0.945	0.904	0.841	0.675	0.502	0.354	0.064
200	74	104.4	7.7	60.8	54	0.1195	0.0657	0.002	0.4386	0.3535	0.0022	0.981	0.975	0.97	0.962	0.957	0.937	0.908	0.815	0.689	0.553	0.118
201	74	88.3	6.5	51.2	44	0.1679	0.0899	0.0041	0.4182	0.3413	0.0022	0.977	0.973	0.969	0.959	0.952	0.922	0.876	0.739	0.577	0.426	0.073
202	74	67.7	5	38.4	33	0.1022	0.0695	0.0984	0.4213	0.3433	0.0027	0.975	0.97	0.964	0.945	0.93	0.872	0.787	0.578	0.38	0.234	0.029
203	74	65.6	4.9	67.6	57	0.0642	0.0586	0.0028	0.7248	0.6186	0.0022	0.987	0.983	0.976	0.958	0.947	0.913	0.872	0.776	0.672	0.571	0.214
204	74	59.5	4.4	64	53	0.0548	0.059	0.0045	0.7359	0.6316	0.0026	0.987	0.983	0.974	0.954	0.941	0.903	0.855	0.747	0.635	0.531	0.192
205	74	66.7	4.9	70.4	60	0.069	0.0588	0.003	0.7271	0.6198	0.002	0.987	0.983	0.976	0.959	0.95	0.919	0.881	0.792	0.693	0.596	0.233
206	74	59.1	4.4	64.6	54	0.0649	0.0607	0.0052	0.741	0.6419	0.002	0.986	0.982	0.974	0.954	0.942	0.905	0.86	0.756	0.647	0.544	0.195
207	74	66.1	4.9	71.8	60	0.062	0.0625	0.0061	0.7349	0.6379	0.0024	0.987	0.983	0.975	0.958	0.948	0.917	0.879	0.79	0.693	0.597	0.243
208	74	70.3	5.2	72.3	61	0.0631	0.0655	0.01	0.6974	0.6042	0.0023	0.988	0.985	0.979	0.964	0.956	0.928	0.893	0.806	0.707	0.608	0.241
209	74	66.6	4.9	72.9	61	0.0681	0.0613	0.0043	0.7359	0.6428	0.0028	0.987	0.984	0.977	0.962	0.954	0.926	0.89	0.802	0.703	0.605	0.246
210	74	56.2	4.2	60.9	49	0.0651	0.0607	0.0044	0.7425	0.6503	0.0025	0.986	0.981	0.971	0.946	0.93	0.883	0.828	0.709	0.594	0.49	0.175
211	74	70	5.2	73.2	62	0.0679	0.069	0.0037	0.7026	0.614	0.0024	0.987	0.984	0.977	0.963	0.954	0.926	0.891	0.804	0.707	0.61	0.248
212	74	72	5.3	45.9	41	0.1298	0.0688	0.0008	0.4615	0.3768	0.0021	0.976	0.971	0.966	0.953	0.943	0.908	0.855	0.702	0.525	0.362	0.041
213	74	55.5	4.1	36.5	32	0.0865	0.0727	0.0026	0.4894	0.3991	0.0028	0.975	0.97	0.963	0.942	0.927	0.866	0.778	0.56	0.357	0.209	0.021
214	74	50.9	3.8	34.9	31	0.092	0.0747	0.0033	0.4943	0.4044	0.0026	0.975	0.969	0.962	0.939	0.921	0.851	0.755	0.527	0.325	0.185	0.02
215	74	63.4	4.7	39.8	35	0.1041	0.0715	0.0008	0.4604	0.3712	0.0021	0.976	0.97	0.964	0.946	0.933	0.884	0.81	0.616	0.419	0.263	0.026
216	74	51	3.8	34.3	30	0.0709	0.0732	0.0024	0.5002	0.4076	0.0025	0.975	0.97	0.962	0.938	0.918	0.846	0.745	0.512	0.311	0.175	0.019
217	74	46.9	3.5	32.3	28	0.0746	0.0786	0.0024	0.4966	0.4068	0.0033	0.974	0.968	0.959	0.929	0.906	0.822	0.711	0.471	0.275	0.15	0.017
218	74	73.4	5.4	44.3	40	0.1292	0.0658	0.0009	0.4532	0.3663	0.0022	0.976	0.971	0.966	0.952	0.942	0.905	0.848	0.686	0.5	0.336	0.036
219	74	53	3.9	34.1	30	0.0826	0.0716	0.0031	0.4786	0.3895	0.0028	0.976	0.97	0.963	0.938	0.919	0.846	0.745	0.512	0.309	0.173	0.018
220	74	79.1	5.9	48.6	43	0.1291	0.0754	0.0032	0.4468	0.3622	0.0024	0.977	0.972	0.967	0.956	0.947	0.917	0.869	0.73	0.562	0.403	0.05
221	74	77.6	5.7	48.8	43	0.1098	0.0745	0.0008	0.4587	0.3713	0.0022	0.977	0.971	0.966	0.953	0.945	0.913	0.865	0.725	0.559	0.402	0.053
222	74	61.1	4.5	38.7	34	0.1037	0.074	0.0008	0.4628	0.3744	0.0021	0.976	0.97	0.964	0.945	0.931	0.878	0.8	0.598	0.399	0.245	0.024
223	74	66.4	4.9	40.2	36	0.1182	0.0753	0.0075	0.4531	0.3673	0.0022	0.976	0.971	0.965	0.948	0.936	0.887	0.814	0.622	0.426	0.269	0.028
224	74	69.1	5.1	43.2	38	0.1073	0.0791	0.0074	0.4562	0.3693	0.0023	0.976	0.971	0.966	0.952	0.941	0.9	0.838	0.665	0.477	0.316	0.034
225	74	69.9	5.2	44.7	39	0.1073	0.0748	0.001	0.4636	0.3779	0.0027	0.976	0.971	0.965	0.949	0.938	0.897	0.837	0.674	0.497	0.342	0.04
226	74	72.1	5.3	45.3	40	0.0995	0.0683	0.0007	0.4588	0.3711	0.0024	0.977	0.971	0.965	0.95	0.939	0.901	0.843	0.683	0.506	0.35	0.042
227	74	79.5	5.9	48.4	43	0.1186	0.0729	0.0022	0.4551	0.3689	0.0023	0.977	0.972	0.967	0.955	0.946	0.915	0.866	0.725	0.556	0.397	0.05
228	74	88.9	6.6	54.6	48	0.1162	0.0764	0.0017	0.4479	0.3626	0.0023	0.978	0.972	0.968	0.958	0.951	0.926	0.888	0.776	0.631	0.483	0.079
229	74	75.7	5.6	48.2	42	0.0889	0.0711	0.0008	0.4638	0.3758	0.0025	0.977	0.972	0.966	0.953	0.944	0.91	0.86	0.716	0.549	0.393	0.051
230	74	91.3	6.8	54.5	48	0.1176	0.0734	0.0049	0.4466	0.3618	0.0021	0.978	0.972	0.968	0.959	0.952	0.928	0.891	0.777	0.631	0.481	0.078
231	74	84.3	6.2	52.4	46	0.1045	0.0792	0.003	0.4525	0.367	0.0024	0.978	0.972	0.968	0.958	0.951	0.925	0.885	0.761	0.606	0.451	0.067
232	74	72.1	5.3	44.2	39	0.1011	0.0696	0.0009	0.4592	0.3718	0.0026	0.977	0.971	0.965	0.95	0.939	0.899	0.839	0.673	0.491	0.332	0.037
233	74	77.9	5.8	49.3	44	0.1007	0.0708	0.0009	0.4611	0.3741	0.0026	0.978	0.972	0.966	0.954	0.946	0.914	0.866	0.729	0.566	0.411	0.055
234	74	92	6.8	53.4	48	0.1562	0.0706	0.002	0.4332	0.3517	0.0024	0.978	0.972	0.968	0.958	0.952	0.928	0.891	0.777	0.629	0.478	0.071
235	74	79.7	5.9	50.7	45	0.1222	0.0723	0.0017	0.4616	0.3754	0.0023	0.977	0.971	0.966	0.955	0.946	0.916	0.87	0.739	0.581	0.429	0.062
236	74	69.7	5.2	45.2	40	0.1044	0.0716	0.0009	0.471	0.383	0.0028	0.976	0.971	0.965	0.951	0.94	0.901	0.842	0.683	0.505	0.348	0.041
237	74	93.8	6.9	56.7	50	0.1368	0.0704	0.0047	0.4513	0.367	0.0024	0.978	0.972	0.968	0.959	0.953	0.93	0.896	0.791	0.654	0.511	0.091
238	74	88.7	6.6	0.7	0	0.0188	0.004	0.9518	0.0064	0.0048	0.0029	0.449	0.168	0.018	0.001	0.001	0.001	0	0	0	0	0
239	74	63.2	4.7	41.5	37	0.0987	0.0714	0.0007	0.4755	0.3876	0.0025	0.975	0.97	0.963	0.946	0.933	0.886	0.817	0.636	0.447	0.291	0.03
240	74	90.2	6.7	54.7	49	0.1247	0.068	0.0031	0.4547	0.3678	0.0024	0.978	0.973	0.968	0.959	0.953	0.931	0.895	0.783	0.637	0.487	0.078
241	74	75.6	5.6	47.6	42	0.1084	0.0804	0.0031	0.459	0.3715	0.0027	0.976	0.971	0.966	0.954	0.944	0.91	0.857	0.708	0.538	0.382	0.05
242	74	65.7	4.9	42.9	38	0.0935	0.0665	0.0007	0.4743	0.3855	0.0025	0.976	0.97	0.963	0.946	0.933	0.887	0.822	0.65	0.469	0.315	0.035
243	74	77.8	5.8	47.6	42	0.1086	0.0706	0.0012	0.4576	0.371	0.0025	0.977	0.972	0.967	0.954	0.945	0.911	0.859	0.712	0.541	0.384	0.049
244	74	77.8	5.8	49.6	43	0.1001	0.0772	0.0015	0.4642	0.3765	0.0025	0.977	0.971	0.966	0.954	0.946	0.914	0.865	0.727	0.563	0.41	0.059
245	74	80.3	5.9	47	42	0.1211	0.0776	0.0109	0.4311	0.3455	0.0024	0.977	0.972	0.967	0.955	0.947	0.915	0.866	0.721	0.546	0.381	0.044
246	74	107.5	8	62	56	0.1548	0.0721	0.0034	0.4321	0.3493	0.0024	0.978	0.973	0.969	0.962	0.957	0.941	0.916	0.835	0.718	0.584	0.119
247	74	93.8	6.9	55	49	0.1219	0.0706	0.003	0.4416	0.3556	0.003	0.978	0.973	0.969	0.959	0.953	0.93	0.894	0.783	0.638	0.488	0.08
248	74	162.7	12	66.4	59	0.1324	0.0693	0.0034	0.2988	0.2408	0.0025	0.988	0.981	0.972	0.964	0.96	0.946	0.924	0.852	0.745	0.619	0.15
249	74	115.6	8.6	68.6	61	0.1615	0.0816	0.007	0.4317	0.3504	0.0031	0.979	0.973	0.97	0.964	0.96	0.946	0.926	0.859	0.76	0.642	0.168
250	74	104.3	7.7	62.3	55	0.1486	0.0725	0.0029	0.4445	0.3626	0.0027	0.978	0.973	0.968	0.96	0.954	0.935	0.906	0.819	0.701	0.571	0.127
251	74	87.4	6.5	52.8	47	0.1371	0.0867	0.0095	0.439	0.3566	0.003	0.977	0.972	0.967	0.956	0.949	0.922	0.882	0.761	0.61	0.459	0.07
252	74	78.2	5.8	47.5	42	0.1931	0.0644	0.0197	0.4426	0.3663	0.0027	0.974	0.969	0.962	0.946	0.934	0.894	0.838	0.692	0.534	0.39	0.057
253	74	75.1	5.6	32	29	0.1423	0.0503	0.2828	0.3186	0.2583	0.0028	0.974	0.969	0.961	0.935	0.914	0.838	0.731	0.484	0.276	0.143	0.012
254	74	87	6.4	35.6	33	0.176	0.053	0.2849	0.2967	0.2411	0.0026	0.974	0.97	0.963	0.945	0.93	0.875	0.792	0.574	0.359	0.2	0.014
255	74	133	9.8	66.9	60	0.1434	0.0721	0.0056	0.3667	0.2971	0.0031	0.984	0.976	0.97	0.963	0.959	0.945	0.923	0.853	0.75	0.627	0.154
256	74	80.6	6	50	44	0.0962	0.0753	0.0019	0.4632	0.3759	0.0031	0.977	0.972	0.967	0.956	0.948	0.919	0.873	0.738	0.574	0.417	0.058
257	74	70.9	5.2	45.1	40	0.0999	0.0802	0.003	0.462	0.3756	0.003	0.977	0.971	0.966	0.952	0.942	0.904	0.847	0.688	0.507	0.347	0.039
258	74	79	5.8	49.8	44	0.107	0.0763	0.0051	0.4592	0.3723	0.003	0.977	0.972	0.967	0.957	0.949	0.92	0.876	0.743	0.579	0.419	0.055
259	74	128.4	9.5	77.9	69	0.1042	0.073	0.0033	0.4508	0.3682	0.0033	0.981	0.974	0.97	0.964	0.961	0.949	0.932	0.878	0.798	0.701	0.244
260	74	79.1	5.9	49.7	44	0.0984	0.0784	0.0052	0.4577	0.3709	0.003	0.977	0.972	0.967	0.956	0.948	0.919	0.873	0.738	0.573	0.415	0.055
261	74	79.8	5.9	52.3	46	0.1087	0.0791	0.0051	0.471	0.3866	0.0024	0.976	0.971	0.966	0.955	0.947	0.918	0.874	0.747	0.595	0.447	0.071
262	74	80	5.9	50.8	44	0.1064	0.0771	0.0086	0.4686	0.3854	0.0022	0.976	0.971	0.966	0.954	0.946	0.914	0.866	0.733	0.577	0.427	0.064
263	74	74	5.5	49.3	43	0.104	0.0796	0.0035	0.477	0.3931	0.0023	0.976	0.97	0.965	0.952	0.942	0.907	0.856	0.716	0.555	0.404	0.06
264	74	71.6	5.3	46.6	40	0.1064	0.0837	0.0107	0.4625	0.3837	0.0025	0.976	0.971	0.965	0.95	0.938	0.896	0.835	0.678	0.509	0.359	0.054
265	74	89.6	6.6	55.7	49	0.1325	0.0774	0.0036	0.4603	0.3777	0.0025	0.976	0.971	0.966	0.956	0.949	0.923	0.886	0.775	0.636	0.494	0.087
266	74	77.2	5.7	49.9	44	0.1327	0.0855	0.0074	0.4617	0.3815	0.0023	0.975	0.97	0.965	0.951	0.942	0.908	0.86	0.726	0.569	0.419	0.06
267	74	90.6	6.7	57.3	51	0.1459	0.084	0.0157	0.4508	0.3731	0.0023	0.976	0.971	0.967	0.957	0.951	0.927	0.891	0.787	0.654	0.514	0.097
268	74	77.3	5.7	48.3	42	0.1217	0.08	0.0028	0.4642	0.3797	0.0028	0.976	0.971	0.965	0.952	0.943	0.908	0.856	0.712	0.546	0.393	0.053
269	74	108	8	68	60	0.1343	0.0811	0.0065	0.4528	0.3718	0.0024	0.978	0.972	0.969	0.962	0.957	0.941	0.917	0.842	0.739	0.622	0.169
270	74	93.1	6.9	58.6	52	0.1319	0.0829	0.0081	0.4539	0.3716	0.003	0.977	0.972	0.968	0.959	0.953	0.932	0.899	0.8	0.669	0.53	0.103
271	74	70.2	5.2	44.4	39	0.1252	0.08	0.0105	0.4648	0.384	0.0026	0.975	0.969	0.963	0.947	0.935	0.891	0.827	0.663	0.488	0.336	0.041
272	74	69.7	5.2	45	38	0.1369	0.0947	0.0055	0.4534	0.3812	0.0029	0.973	0.968	0.96	0.937	0.921	0.867	0.797	0.634	0.472	0.337	0.057
273	74	84.4	6.2	55	48	0.1231	0.083	0.0025	0.4679	0.3847	0.0029	0.976	0.971	0.967	0.956	0.949	0.923	0.883	0.769	0.626	0.482	0.084
274	74	97.2	7.2	60.5	54	0.1321	0.077	0.0029	0.4589	0.3776	0.0029	0.977	0.972	0.968	0.959	0.953	0.933	0.902	0.809	0.686	0.553	0.115
275	74	96	7.1	61.2	54	0.1268	0.077	0.0025	0.4599	0.377	0.0026	0.977	0.971	0.967	0.957	0.951	0.93	0.9	0.809	0.69	0.56	0.122
276	74	52.1	3.9	32.3	28	0.1257	0.0839	0.0754	0.4328	0.3653	0.0029	0.971	0.966	0.954	0.916	0.889	0.799	0.691	0.465	0.282	0.161	0.017
277	74	82.3	6.1	51.8	45	0.1242	0.0836	0.0091	0.46	0.3831	0.0027	0.975	0.97	0.964	0.951	0.941	0.906	0.856	0.726	0.577	0.436	0.075
278	74	62.4	4.6	41.2	35	0.1323	0.0925	0.0099	0.4621	0.3891	0.0026	0.973	0.968	0.961	0.937	0.919	0.859	0.78	0.599	0.424	0.285	0.041
279	74	86.6	6.4	53.7	47	0.1357	0.0818	0.0154	0.4518	0.3762	0.0026	0.976	0.971	0.966	0.955	0.946	0.916	0.871	0.75	0.606	0.463	0.082
280	74	88.8	6.6	56.2	49	0.11	0.0803	0.0014	0.4665	0.384	0.0031	0.977	0.971	0.967	0.957	0.95	0.924	0.885	0.773	0.634	0.493	0.092
281	74	94.8	7	60.9	53	0.1183	0.0853	0.0062	0.4573	0.3791	0.0026	0.977	0.972	0.968	0.959	0.953	0.931	0.898	0.8	0.676	0.544	0.122
282	74	86.6	6.4	55.6	49	0.1099	0.081	0.0109	0.4633	0.3788	0.0048	0.977	0.972	0.967	0.958	0.951	0.926	0.888	0.776	0.635	0.491	0.086
283	74	84.5	6.3	53.4	47	0.1007	0.0758	0.0026	0.4709	0.3837	0.0044	0.977	0.972	0.967	0.957	0.95	0.923	0.882	0.763	0.614	0.466	0.074
284	74	71.1	5.3	46.6	41	0.0942	0.0792	0.0019	0.4752	0.3869	0.0047	0.976	0.971	0.965	0.951	0.94	0.903	0.847	0.695	0.524	0.37	0.046
285	74	57.4	4.2	38.2	33	0.1081	0.081	0.0211	0.4766	0.3924	0.0046	0.974	0.969	0.963	0.943	0.927	0.868	0.786	0.581	0.385	0.236	0.026
286	74	71.5	5.3	45.4	40	0.1018	0.0793	0.0038	0.4731	0.3861	0.0046	0.976	0.97	0.965	0.95	0.939	0.899	0.84	0.68	0.505	0.351	0.043
287	74	89.6	6.6	55.9	49	0.0987	0.0801	0.0013	0.4571	0.3689	0.0044	0.978	0.972	0.967	0.957	0.951	0.927	0.891	0.782	0.642	0.498	0.088
288	74	98.1	7.3	62.1	55	0.0988	0.0832	0.0123	0.4559	0.3736	0.005	0.978	0.972	0.968	0.96	0.955	0.936	0.907	0.817	0.697	0.566	0.125
289	74	93.3	6.9	56.5	50	0.1138	0.078	0.0025	0.4469	0.3679	0.0027	0.978	0.972	0.967	0.956	0.949	0.923	0.886	0.776	0.64	0.501	0.094
290	74	86.2	6.4	53.7	47	0.1016	0.0831	0.0023	0.4506	0.3679	0.0026	0.978	0.972	0.967	0.957	0.95	0.923	0.883	0.764	0.615	0.467	0.075
291	74	48.2	3.6	28	23	0.126	0.0813	0.103	0.4063	0.3427	0.0026	0.972	0.966	0.952	0.897	0.858	0.735	0.597	0.356	0.199	0.114	0.016
292	74	81.3	6	48.9	43	0.1022	0.0761	0.005	0.4492	0.3655	0.0031	0.977	0.971	0.966	0.953	0.944	0.911	0.861	0.722	0.558	0.405	0.055
293	74	95.3	7.1	59.9	53	0.1082	0.0792	0.0059	0.4509	0.371	0.0025	0.978	0.972	0.967	0.958	0.952	0.93	0.898	0.801	0.675	0.541	0.112
294	74	52.8	3.9	38.5	33	0.1088	0.0799	0.0136	0.5133	0.4302	0.0026	0.973	0.968	0.961	0.935	0.916	0.848	0.761	0.561	0.378	0.242	0.035
295	74	46.9	3.5	33.8	29	0.1061	0.0823	0.0239	0.5055	0.4252	0.0027	0.972	0.967	0.957	0.922	0.896	0.81	0.705	0.483	0.3	0.179	0.024
296	74	101.4	7.5	63.2	55	0.0824	0.0743	0.0083	0.4703	0.3777	0.0026	0.979	0.974	0.97	0.963	0.958	0.941	0.914	0.827	0.707	0.576	0.134
297	74	92.5	6.8	52.2	46	0.1087	0.079	0.0063	0.4165	0.3329	0.0042	0.979	0.973	0.969	0.958	0.951	0.924	0.883	0.758	0.603	0.45	0.068
298	74	76.7	5.7	46.1	40	0.1094	0.0865	0.0113	0.4351	0.3542	0.0036	0.977	0.972	0.967	0.953	0.942	0.902	0.841	0.68	0.506	0.353	0.051
299	74	71.9	5.3	42.3	37	0.0941	0.073	0.0024	0.4432	0.3567	0.0039	0.977	0.972	0.966	0.949	0.937	0.891	0.822	0.642	0.456	0.302	0.034
300	74	76.3	5.6	45.1	40	0.1011	0.0802	0.0036	0.4342	0.3493	0.004	0.978	0.972	0.967	0.953	0.943	0.904	0.844	0.681	0.502	0.346	0.042
301	74	46.6	3.4	31.1	27	0.0491	0.0728	0.0034	0.4916	0.394	0.0025	0.975	0.969	0.961	0.929	0.903	0.809	0.687	0.438	0.251	0.137	0.016
302	74	89.7	6.6	50.9	45	0.1045	0.0732	0.0096	0.4205	0.3351	0.004	0.976	0.969	0.963	0.951	0.943	0.915	0.872	0.746	0.588	0.435	0.064
303	74	70.7	5.2	41.9	37	0.1101	0.0775	0.0286	0.4421	0.3606	0.0039	0.974	0.968	0.962	0.945	0.932	0.885	0.815	0.636	0.451	0.299	0.035
304	74	91.9	6.8	62.5	52	0.1206	0.0767	0.0211	0.4903	0.4115	0.003	0.976	0.972	0.967	0.957	0.949	0.921	0.881	0.775	0.65	0.524	0.147
305	74	66.4	4.9	43.1	37	0.0693	0.082	0.0093	0.4729	0.3829	0.0029	0.974	0.967	0.96	0.944	0.931	0.884	0.815	0.639	0.46	0.312	0.042
306	74	57.8	4.3	36.6	32	0.0674	0.077	0.0056	0.477	0.3845	0.003	0.976	0.971	0.964	0.943	0.925	0.86	0.767	0.549	0.353	0.213	0.024
307	74	58.6	4.3	35.9	31	0.0748	0.0853	0.0025	0.4516	0.3624	0.0038	0.976	0.971	0.964	0.941	0.923	0.858	0.765	0.543	0.344	0.204	0.02
308	74	70.9	5.2	41.6	37	0.0721	0.0749	0.0055	0.4368	0.3467	0.0033	0.976	0.97	0.963	0.947	0.934	0.889	0.82	0.637	0.447	0.294	0.032
309	74	86.5	6.4	52	46	0.0754	0.0766	0.0062	0.4524	0.3646	0.0034	0.979	0.973	0.969	0.959	0.951	0.923	0.88	0.752	0.596	0.444	0.069
310	74	86.2	6.4	52.9	47	0.0766	0.0769	0.0026	0.4507	0.3621	0.0035	0.979	0.973	0.968	0.958	0.951	0.924	0.883	0.76	0.608	0.458	0.072
311	74	60	4.4	36.2	32	0.0728	0.0787	0.0087	0.4465	0.3565	0.0035	0.976	0.971	0.964	0.942	0.925	0.862	0.771	0.551	0.35	0.208	0.02
312	74	58.2	4.3	34.3	30	0.0718	0.0776	0.003	0.447	0.3576	0.0032	0.976	0.97	0.963	0.938	0.918	0.844	0.743	0.511	0.313	0.179	0.017
313	74	131.5	9.7	74.3	65	0.0723	0.075	0.0022	0.4182	0.3338	0.0039	0.983	0.976	0.971	0.965	0.962	0.949	0.93	0.87	0.781	0.674	0.218
314	74	72.9	5.4	46	41	0.1049	0.0808	0.0116	0.458	0.3727	0.0027	0.976	0.971	0.966	0.952	0.942	0.904	0.848	0.692	0.517	0.361	0.044
315	74	104.8	7.8	64	56	0.1028	0.0773	0.0014	0.457	0.3706	0.0024	0.978	0.972	0.968	0.96	0.955	0.938	0.911	0.828	0.713	0.586	0.139
316	74	81	6	50.5	44	0.1074	0.0795	0.0198	0.4509	0.3678	0.0025	0.977	0.971	0.966	0.954	0.946	0.915	0.869	0.736	0.578	0.426	0.061
317	74	90.7	6.7	52.2	46	0.1139	0.0713	0.004	0.4354	0.3487	0.0025	0.978	0.972	0.968	0.958	0.95	0.924	0.882	0.757	0.601	0.448	0.068
318	74	101.3	7.5	57.4	50	0.1123	0.0688	0.0033	0.4315	0.3437	0.0026	0.979	0.973	0.969	0.96	0.954	0.932	0.898	0.793	0.656	0.513	0.099
319	74	71.2	5.3	43.6	38	0.0998	0.0837	0.0029	0.4479	0.3617	0.003	0.977	0.972	0.966	0.951	0.94	0.897	0.834	0.662	0.478	0.322	0.037
320	74	70.2	5.2	43.7	38	0.0988	0.0833	0.0083	0.4523	0.3675	0.0027	0.976	0.97	0.964	0.948	0.936	0.892	0.827	0.656	0.475	0.323	0.04
321	74	95	7	55.4	49	0.0948	0.0774	0.0026	0.4394	0.3541	0.0028	0.979	0.973	0.968	0.957	0.95	0.924	0.886	0.773	0.632	0.488	0.089
322	74	103.6	7.7	61.8	54	0.1009	0.0824	0.0028	0.4364	0.3523	0.0029	0.979	0.974	0.969	0.961	0.956	0.937	0.907	0.817	0.696	0.564	0.126
323	74	72.6	5.4	43.7	39	0.0996	0.0798	0.0075	0.4427	0.3559	0.0029	0.974	0.968	0.961	0.945	0.934	0.893	0.832	0.665	0.483	0.328	0.037
324	74	73.3	5.4	43.6	38	0.1003	0.0786	0.0024	0.4466	0.3619	0.0027	0.977	0.971	0.965	0.949	0.937	0.892	0.828	0.659	0.479	0.325	0.038
325	74	71.4	5.3	44.1	38	0.1034	0.0817	0.0153	0.4474	0.3649	0.003	0.975	0.969	0.963	0.948	0.936	0.892	0.828	0.658	0.479	0.327	0.044
326	74	77.7	5.7	46.5	41	0.101	0.0772	0.0074	0.4396	0.3533	0.0025	0.977	0.971	0.965	0.951	0.941	0.905	0.851	0.7	0.527	0.37	0.044
327	74	87.8	6.5	51.2	45	0.0976	0.0769	0.0012	0.4408	0.3541	0.0023	0.978	0.972	0.967	0.955	0.947	0.918	0.875	0.747	0.589	0.436	0.064
328	74	88	6.5	54.5	48	0.1042	0.0832	0.0033	0.4502	0.3659	0.0023	0.977	0.972	0.967	0.956	0.949	0.922	0.882	0.764	0.618	0.475	0.084
329	74	79.8	5.9	48.4	42	0.1265	0.0772	0.0211	0.44	0.3579	0.0026	0.977	0.972	0.967	0.955	0.945	0.91	0.857	0.709	0.541	0.389	0.057
330	74	81.2	6	8.2	7	0.039	0.0114	0.8353	0.0733	0.0611	0.0022	0.948	0.903	0.768	0.448	0.32	0.129	0.056	0.015	0.006	0.002	0
331	74	104.2	7.7	50.9	42	0.2952	0.0586	0.09	0.346	0.2871	0.0029	0.974	0.97	0.964	0.948	0.936	0.891	0.829	0.679	0.528	0.401	0.099
332	74	69.8	5.2	39.4	35	0.0969	0.0732	0.0052	0.4215	0.3333	0.0025	0.975	0.969	0.962	0.943	0.929	0.877	0.802	0.607	0.411	0.259	0.026
333	74	87.1	6.4	50.1	44	0.0937	0.071	0.0091	0.4365	0.3489	0.0026	0.978	0.973	0.968	0.957	0.949	0.918	0.872	0.735	0.572	0.418	0.06
334	74	75.8	5.6	45	40	0.0957	0.0776	0.0057	0.4385	0.3509	0.0027	0.977	0.972	0.967	0.954	0.943	0.904	0.845	0.68	0.5	0.344	0.042
335	74	55.5	4.1	32.7	29	0.1172	0.0728	0.0379	0.4427	0.3588	0.0024	0.972	0.966	0.957	0.929	0.907	0.828	0.721	0.485	0.289	0.16	0.016
336	74	51.2	3.8	30.4	25	0.1175	0.0925	0.0354	0.4258	0.3501	0.0032	0.974	0.969	0.958	0.915	0.881	0.771	0.642	0.405	0.239	0.141	0.019
337	74	71.2	5.3	40.9	35	0.0975	0.0815	0.0025	0.4365	0.3512	0.0032	0.977	0.971	0.965	0.946	0.931	0.878	0.802	0.613	0.428	0.281	0.033
338	74	55.5	4.1	34	30	0.0908	0.0782	0.0102	0.4497	0.3618	0.0039	0.976	0.97	0.963	0.938	0.918	0.845	0.743	0.509	0.309	0.175	0.017
339	74	120.6	8.9	66	58	0.1026	0.0758	0.0257	0.4136	0.3337	0.0036	0.98	0.973	0.968	0.96	0.955	0.939	0.914	0.835	0.726	0.604	0.158
340	74	49.6	3.7	29	25	0.0716	0.0764	0.0021	0.4452	0.355	0.0038	0.975	0.969	0.959	0.922	0.893	0.792	0.661	0.398	0.212	0.108	0.011
341	74	62.8	4.6	37	32	0.0852	0.0849	0.0098	0.4336	0.3479	0.0039	0.973	0.967	0.958	0.935	0.918	0.855	0.768	0.559	0.367	0.225	0.023
342	74	68.2	5	41.6	36	0.085	0.0787	0.0124	0.4472	0.36	0.0038	0.977	0.971	0.966	0.949	0.936	0.889	0.819	0.634	0.445	0.291	0.032
343	74	163.1	12.1	87.8	78	0.0919	0.0703	0.0037	0.4102	0.327	0.0037	0.984	0.977	0.972	0.967	0.964	0.955	0.943	0.904	0.844	0.766	0.325
344	74	53.3	3.9	32.3	28	0.0739	0.0841	0.0061	0.446	0.3582	0.004	0.976	0.97	0.961	0.932	0.909	0.826	0.715	0.471	0.276	0.152	0.015
345	74	75.3	5.6	43.3	39	0.1084	0.0683	0.0115	0.4267	0.3394	0.0031	0.974	0.967	0.96	0.943	0.932	0.892	0.832	0.667	0.483	0.324	0.034
346	74	117.8	8.7	67.9	60	0.1005	0.0755	0.0037	0.435	0.3501	0.0029	0.98	0.974	0.969	0.962	0.958	0.942	0.919	0.847	0.744	0.624	0.168
347	74	103.1	7.6	62	54	0.1012	0.0779	0.0021	0.4419	0.3554	0.0029	0.979	0.973	0.969	0.961	0.956	0.937	0.907	0.815	0.691	0.559	0.129
348	74	81.3	6	47.4	42	0.1562	0.0713	0.0112	0.4358	0.3534	0.0025	0.968	0.961	0.952	0.933	0.921	0.881	0.826	0.686	0.533	0.393	0.057
349	74	71.9	5.3	39.9	34	0.1484	0.0828	0.03	0.4131	0.3381	0.0026	0.972	0.966	0.958	0.935	0.918	0.859	0.778	0.59	0.411	0.271	0.034
350	74	76.6	5.7	43.9	39	0.1028	0.0792	0.0071	0.4241	0.3383	0.0034	0.972	0.966	0.958	0.942	0.93	0.89	0.829	0.664	0.483	0.329	0.039
351	74	56	4.1	32.6	28	0.1335	0.076	0.0717	0.4178	0.3433	0.003	0.973	0.967	0.959	0.928	0.903	0.816	0.702	0.463	0.279	0.163	0.02
352	74	75.1	5.6	44.4	39	0.1034	0.0791	0.0028	0.443	0.3583	0.0031	0.977	0.972	0.966	0.951	0.939	0.895	0.831	0.663	0.485	0.332	0.043
353	74	80.9	6	47.2	41	0.1086	0.0831	0.0019	0.4285	0.3443	0.0033	0.978	0.972	0.967	0.954	0.944	0.908	0.854	0.704	0.533	0.377	0.05
354	74	123.7	9.2	67.5	60	0.1163	0.0776	0.0084	0.4136	0.3312	0.0032	0.977	0.97	0.964	0.956	0.951	0.935	0.913	0.844	0.744	0.625	0.168
355	74	68.8	5.1	38.1	33	0.1008	0.0791	0.0023	0.4221	0.3366	0.0031	0.977	0.971	0.964	0.943	0.927	0.869	0.786	0.58	0.384	0.238	0.024
356	74	78.1	5.8	45.5	40	0.0947	0.0829	0.0024	0.4287	0.3441	0.0034	0.978	0.972	0.967	0.953	0.942	0.903	0.844	0.683	0.505	0.35	0.044
357	74	85	6.3	54.1	48	0.1181	0.0767	0.0202	0.4581	0.3756	0.0029	0.975	0.969	0.964	0.953	0.946	0.92	0.881	0.764	0.62	0.474	0.081
358	74	82.9	6.1	54.2	46	0.1057	0.0791	0.0141	0.4784	0.3959	0.0028	0.976	0.971	0.967	0.956	0.948	0.917	0.871	0.745	0.598	0.456	0.09
359	74	99	7.3	33.4	31	0.213	0.0402	0.36	0.2411	0.1988	0.0022	0.974	0.97	0.965	0.946	0.931	0.87	0.777	0.541	0.316	0.163	0.008
360	74	51.5	3.8	36.8	32	0.1099	0.0766	0.0056	0.5088	0.4225	0.003	0.973	0.968	0.96	0.934	0.915	0.846	0.755	0.546	0.357	0.219	0.026
361	74	65.6	4.9	38.6	34	0.1132	0.0756	0.0392	0.431	0.3477	0.0029	0.971	0.964	0.956	0.936	0.921	0.866	0.787	0.589	0.397	0.249	0.027
362	74	92.6	6.9	52.3	46	0.1033	0.0772	0.0024	0.43	0.3427	0.0031	0.978	0.973	0.968	0.958	0.95	0.922	0.879	0.752	0.596	0.446	0.072
363	74	102.7	7.6	58.7	52	0.113	0.0751	0.0094	0.4243	0.3378	0.0028	0.975	0.968	0.962	0.953	0.947	0.926	0.895	0.797	0.667	0.53	0.11
364	74	41.4	3.1	24.1	21	0.1137	0.0804	0.114	0.416	0.3437	0.0023	0.969	0.962	0.944	0.881	0.835	0.691	0.536	0.281	0.135	0.066	0.008
365	74	77.3	5.7	44.7	40	0.1025	0.0696	0.0036	0.439	0.3496	0.0025	0.973	0.967	0.96	0.944	0.933	0.894	0.836	0.678	0.5	0.344	0.04
366	74	113.1	8.4	65.4	57	0.1086	0.0793	0.0023	0.4271	0.3414	0.0026	0.979	0.974	0.969	0.962	0.957	0.939	0.913	0.834	0.724	0.598	0.152
367	74	67.4	5	40.7	36	0.1407	0.0813	0.0273	0.4351	0.3562	0.0025	0.975	0.97	0.964	0.945	0.93	0.876	0.8	0.614	0.43	0.282	0.032
368	74	133.1	9.9	78.6	71	0.1093	0.0728	0.0116	0.4323	0.3487	0.0024	0.978	0.971	0.965	0.958	0.955	0.943	0.928	0.88	0.808	0.715	0.256
369	74	76.2	5.6	47.7	41	0.0921	0.0797	0.0046	0.4663	0.3804	0.0023	0.977	0.971	0.966	0.952	0.942	0.905	0.849	0.698	0.531	0.38	0.055
370	74	81	6	52.9	46	0.0976	0.0783	0.0057	0.4716	0.3854	0.0023	0.976	0.971	0.966	0.955	0.948	0.919	0.876	0.753	0.603	0.456	0.074
371	74	72.3	5.3	41.3	37	0.1141	0.0724	0.0234	0.4274	0.3463	0.0028	0.972	0.964	0.956	0.938	0.926	0.88	0.812	0.634	0.446	0.292	0.031
372	74	94.6	7	53.5	47	0.1048	0.0747	0.0022	0.4267	0.3429	0.0029	0.979	0.973	0.968	0.958	0.951	0.925	0.884	0.765	0.615	0.466	0.076
373	74	93.5	6.9	56.5	49	0.1092	0.0838	0.0073	0.4408	0.3567	0.0028	0.974	0.967	0.96	0.949	0.942	0.918	0.881	0.772	0.636	0.498	0.099
374	74	65.7	4.9	38.1	32	0.0975	0.0887	0.0158	0.4267	0.3432	0.0025	0.972	0.965	0.955	0.928	0.909	0.841	0.754	0.556	0.38	0.248	0.03
375	74	95.3	7.1	53.5	47	0.0847	0.0717	0.0023	0.4283	0.3408	0.0028	0.979	0.974	0.969	0.959	0.952	0.926	0.886	0.765	0.614	0.465	0.078
376	74	70.6	5.2	41.2	36	0.0871	0.0768	0.0016	0.4339	0.3445	0.0028	0.977	0.972	0.966	0.949	0.937	0.889	0.818	0.631	0.439	0.285	0.03
377	74	82.1	6.1	55.2	49	0.1066	0.0778	0.0051	0.4858	0.3965	0.0029	0.977	0.972	0.968	0.959	0.952	0.929	0.892	0.779	0.634	0.486	0.083
378	74	90.6	6.7	32.3	29	0.203	0.0387	0.3374	0.2564	0.2096	0.0024	0.973	0.968	0.961	0.937	0.916	0.838	0.73	0.488	0.286	0.157	0.011
379	74	128.9	9.5	71.3	63	0.103	0.0743	0.0021	0.4211	0.3375	0.0026	0.981	0.975	0.97	0.963	0.959	0.944	0.922	0.855	0.759	0.647	0.197
380	74	67.1	5	40.3	35	0.1005	0.0804	0.0065	0.4404	0.355	0.0028	0.974	0.968	0.96	0.94	0.925	0.87	0.792	0.601	0.418	0.275	0.034
381	74	67.5	5	44.3	39	0.0938	0.0825	0.0143	0.4711	0.3875	0.0042	0.975	0.97	0.964	0.949	0.937	0.893	0.828	0.661	0.484	0.331	0.043
382	74	79.8	5.9	50.9	44	0.0946	0.0796	0.0048	0.4727	0.3874	0.0035	0.976	0.971	0.966	0.954	0.946	0.914	0.867	0.733	0.576	0.427	0.066
383	74	85.3	6.3	55.7	49	0.0992	0.0816	0.0028	0.4705	0.3858	0.0036	0.977	0.971	0.967	0.957	0.95	0.924	0.885	0.771	0.63	0.489	0.09
384	74	105	7.8	67.5	59	0.1056	0.0775	0.0089	0.4643	0.3798	0.0037	0.978	0.973	0.968	0.962	0.957	0.941	0.917	0.842	0.737	0.618	0.165
385	74	119.8	8.9	71.3	63	0.1122	0.0753	0.0011	0.4462	0.3612	0.0055	0.979	0.974	0.97	0.963	0.959	0.946	0.925	0.859	0.763	0.65	0.192
386	74	90.6	6.7	56.4	49	0.1061	0.0782	0.0009	0.4553	0.3677	0.0056	0.978	0.972	0.968	0.958	0.952	0.927	0.889	0.777	0.637	0.496	0.095
387	74	61.4	4.5	37.7	33	0.0977	0.0791	0.0187	0.459	0.3725	0.0075	0.975	0.97	0.964	0.944	0.929	0.871	0.787	0.579	0.379	0.23	0.023
388	67	87.2	5.8	45.3	40	0.1369	0.0795	0.0014	0.4267	0.3486	0.0022	0.977	0.971	0.966	0.952	0.942	0.905	0.849	0.691	0.513	0.354	0.041
389	74	84	6.2	52.2	46	0.1413	0.0819	0.0032	0.4474	0.3669	0.0024	0.977	0.971	0.966	0.955	0.947	0.918	0.874	0.75	0.6	0.453	0.071
390	74	77.6	5.7	46.3	40	0.134	0.0932	0.014	0.4279	0.3523	0.0023	0.976	0.971	0.965	0.95	0.939	0.898	0.839	0.682	0.512	0.363	0.051
391	74	77.7	5.7	47.5	42	0.1069	0.0789	0.0011	0.457	0.3711	0.0023	0.976	0.971	0.965	0.952	0.943	0.908	0.855	0.707	0.537	0.382	0.049
392	74	71.4	5.3	45.5	39	0.1353	0.0889	0.0051	0.4502	0.3761	0.0023	0.974	0.969	0.962	0.944	0.93	0.882	0.818	0.66	0.496	0.353	0.051
393	74	85.9	6.4	52.7	47	0.1207	0.0744	0.0105	0.4575	0.3721	0.0025	0.977	0.972	0.967	0.958	0.951	0.925	0.885	0.763	0.611	0.459	0.069
394	74	75.4	5.6	44.8	40	0.1464	0.0738	0.0027	0.4436	0.3595	0.0056	0.976	0.971	0.966	0.952	0.942	0.903	0.844	0.681	0.5	0.341	0.04
395	74	100.5	7.4	60	53	0.131	0.077	0.0017	0.4379	0.3523	0.0057	0.978	0.973	0.968	0.96	0.954	0.934	0.904	0.809	0.682	0.545	0.113
396	74	69.3	5.1	45.6	38	0.153	0.0792	0.0394	0.4571	0.3878	0.0027	0.974	0.969	0.961	0.938	0.921	0.866	0.796	0.633	0.474	0.342	0.065
397	74	66.4	4.9	41.1	37	0.1022	0.0703	0.0207	0.4526	0.3658	0.0027	0.975	0.97	0.964	0.947	0.935	0.89	0.821	0.638	0.445	0.286	0.028
398	74	90.9	6.7	55	48	0.102	0.0753	0.0023	0.4528	0.3674	0.0023	0.978	0.972	0.967	0.957	0.95	0.924	0.884	0.769	0.626	0.482	0.085
399	74	77.3	5.7	48.3	42	0.1035	0.08	0.0017	0.4554	0.369	0.0023	0.976	0.971	0.966	0.953	0.944	0.911	0.86	0.716	0.548	0.394	0.053
400	74	62.9	4.7	39.9	34	0.1276	0.0836	0.03	0.4493	0.3738	0.006	0.974	0.969	0.963	0.943	0.927	0.869	0.788	0.594	0.405	0.259	0.036
401	74	76	5.6	46.2	40	0.0961	0.0793	0.0076	0.4572	0.3694	0.0025	0.976	0.971	0.966	0.953	0.943	0.905	0.848	0.69	0.515	0.359	0.047
402	74	93.2	6.9	60.7	53	0.1167	0.0782	0.0048	0.4677	0.3844	0.0022	0.977	0.972	0.967	0.958	0.952	0.932	0.901	0.807	0.683	0.549	0.116
403	74	78.6	5.8	49.6	43	0.1442	0.0839	0.0206	0.4476	0.3719	0.0057	0.975	0.97	0.966	0.953	0.943	0.908	0.855	0.713	0.552	0.403	0.065
404	74	58.5	4.3	33	28	0.1205	0.0823	0.0401	0.42	0.3445	0.0024	0.973	0.967	0.956	0.92	0.893	0.803	0.694	0.47	0.293	0.175	0.019
405	74	80.5	6	51.9	45	0.1045	0.0817	0.0096	0.462	0.3806	0.0022	0.976	0.971	0.966	0.955	0.946	0.916	0.869	0.739	0.586	0.439	0.071
406	74	89.2	6.6	55.6	49	0.0947	0.0792	0.0049	0.4536	0.3681	0.009	0.977	0.971	0.967	0.957	0.95	0.926	0.889	0.779	0.638	0.492	0.086
407	74	52.4	3.9	32.4	28	0.1393	0.0855	0.0456	0.4393	0.3751	0.0093	0.97	0.964	0.951	0.91	0.881	0.792	0.687	0.467	0.287	0.167	0.019
408	74	78.1	5.8	51.2	44	0.118	0.0853	0.0087	0.4664	0.3869	0.0056	0.975	0.97	0.965	0.952	0.943	0.908	0.859	0.725	0.571	0.426	0.071
409	74	63.5	4.7	41.2	36	0.1253	0.0732	0.0341	0.4753	0.3934	0.0023	0.974	0.969	0.964	0.945	0.931	0.879	0.806	0.622	0.437	0.286	0.034
410	74	100.9	7.5	63.1	56	0.1061	0.0716	0.0041	0.4689	0.3795	0.0022	0.978	0.972	0.968	0.96	0.955	0.937	0.91	0.827	0.712	0.583	0.133
411	74	88	6.5	56.3	50	0.0899	0.0769	0.0014	0.4693	0.3777	0.0023	0.978	0.972	0.968	0.958	0.952	0.929	0.893	0.787	0.648	0.504	0.09
412	74	59.8	4.4	38.4	32	0.1128	0.0831	0.0555	0.4565	0.3782	0.0023	0.974	0.969	0.962	0.937	0.918	0.849	0.759	0.557	0.376	0.243	0.034
413	74	91.2	6.8	56.5	50	0.098	0.0708	0.0012	0.467	0.376	0.0023	0.978	0.972	0.968	0.958	0.951	0.927	0.891	0.785	0.647	0.505	0.093
414	74	80.5	6	51.8	46	0.0947	0.0768	0.0049	0.471	0.3802	0.0022	0.977	0.971	0.966	0.954	0.946	0.917	0.874	0.749	0.595	0.444	0.068
415	74	76.2	5.6	46.8	41	0.087	0.0762	0.0063	0.4553	0.363	0.0025	0.977	0.972	0.966	0.953	0.943	0.908	0.855	0.706	0.532	0.374	0.046
416	74	114.9	8.5	65.8	58	0.1117	0.0785	0.0027	0.4336	0.3478	0.0046	0.979	0.973	0.969	0.962	0.957	0.94	0.915	0.837	0.729	0.605	0.154
417	74	99.3	7.4	58.6	52	0.1139	0.0879	0.0018	0.4323	0.3483	0.0045	0.978	0.973	0.968	0.958	0.952	0.929	0.896	0.796	0.665	0.527	0.107
418	74	112.6	8.3	69.7	61	0.1111	0.0779	0.0048	0.4477	0.3655	0.0023	0.979	0.973	0.968	0.961	0.957	0.942	0.919	0.849	0.751	0.637	0.182
419	74	46.2	3.4	29	23	0.1358	0.0813	0.0761	0.4417	0.3705	0.0044	0.972	0.966	0.953	0.899	0.859	0.737	0.603	0.366	0.214	0.129	0.02
420	74	90.3	6.7	51.7	45	0.1079	0.0783	0.0024	0.4332	0.3482	0.0052	0.978	0.972	0.967	0.956	0.947	0.917	0.873	0.745	0.59	0.441	0.07
421	74	103	7.6	61.6	54	0.1135	0.0839	0.0033	0.4375	0.3531	0.0046	0.978	0.973	0.969	0.961	0.955	0.936	0.906	0.814	0.692	0.559	0.125
422	74	85.5	6.3	55.5	49	0.0974	0.0768	0.0027	0.4733	0.3833	0.0026	0.978	0.972	0.968	0.958	0.951	0.927	0.89	0.779	0.637	0.492	0.086
423	74	73.7	5.5	47.2	42	0.0861	0.0719	0.008	0.4799	0.3887	0.0024	0.977	0.971	0.966	0.952	0.943	0.907	0.854	0.705	0.534	0.378	0.048
424	74	84.8	6.3	53.7	47	0.0899	0.0695	0.0022	0.4769	0.3848	0.0024	0.978	0.972	0.967	0.956	0.949	0.922	0.883	0.765	0.616	0.469	0.078
425	74	92.4	6.8	58.1	51	0.0915	0.0774	0.002	0.4617	0.3716	0.0025	0.978	0.973	0.968	0.959	0.952	0.93	0.896	0.795	0.663	0.523	0.104
426	74	80.6	6	49.6	44	0.1095	0.083	0.0089	0.4496	0.3636	0.0028	0.977	0.972	0.966	0.954	0.945	0.914	0.866	0.731	0.569	0.414	0.057
427	74	108.2	8	66.7	59	0.1189	0.0797	0.0047	0.4588	0.3741	0.0027	0.978	0.973	0.969	0.962	0.958	0.941	0.916	0.837	0.73	0.609	0.159
428	74	50.9	3.8	29.8	25	0.1268	0.0864	0.0654	0.4199	0.3448	0.0035	0.974	0.97	0.961	0.921	0.888	0.775	0.64	0.389	0.222	0.129	0.019
429	74	99.6	7.4	58.4	52	0.1126	0.0779	0.0048	0.441	0.3557	0.0028	0.978	0.973	0.968	0.959	0.953	0.931	0.898	0.798	0.667	0.528	0.104
430	74	87.8	6.5	54.1	47	0.0932	0.0769	0.0104	0.46	0.3746	0.0068	0.978	0.972	0.967	0.955	0.947	0.919	0.877	0.758	0.614	0.471	0.083
431	74	63.9	4.7	39.9	35	0.0832	0.0793	0.0061	0.4597	0.3691	0.0077	0.977	0.971	0.964	0.944	0.929	0.877	0.803	0.611	0.42	0.27	0.027
432	74	90.1	6.7	55.9	49	0.1051	0.0837	0.0028	0.4535	0.3665	0.0046	0.977	0.972	0.967	0.955	0.947	0.921	0.882	0.772	0.634	0.494	0.093
433	74	88	6.5	52.1	45	0.0991	0.0727	0.0012	0.4491	0.3598	0.004	0.977	0.971	0.965	0.949	0.939	0.903	0.854	0.724	0.577	0.44	0.083
434	74	71.9	5.3	45.6	40	0.0914	0.0846	0.0031	0.4626	0.3744	0.0043	0.976	0.971	0.965	0.95	0.939	0.899	0.841	0.683	0.509	0.355	0.043
435	74	74.1	5.5	46.3	41	0.1047	0.0777	0.0154	0.4567	0.3694	0.0043	0.976	0.971	0.965	0.952	0.942	0.905	0.851	0.699	0.524	0.366	0.045
436	74	85.6	6.3	50.1	43	0.1354	0.0765	0.0052	0.4398	0.3557	0.0045	0.978	0.972	0.968	0.957	0.949	0.918	0.869	0.728	0.563	0.41	0.068
437	74	48.5	3.6	27.1	23	0.1072	0.0751	0.1301	0.4023	0.3297	0.0039	0.972	0.965	0.95	0.899	0.861	0.742	0.605	0.355	0.189	0.097	0.009
438	74	79.8	5.9	48.5	43	0.0843	0.0787	0.0117	0.4484	0.3592	0.0048	0.977	0.972	0.967	0.955	0.946	0.914	0.864	0.721	0.553	0.397	0.053
439	74	86.1	6.4	50.5	44	0.1066	0.0756	0.0051	0.4424	0.3555	0.0027	0.978	0.973	0.968	0.957	0.949	0.918	0.871	0.735	0.573	0.421	0.063
440	74	91.5	6.8	55.7	49	0.1186	0.0802	0.0035	0.445	0.3595	0.0027	0.978	0.973	0.969	0.96	0.954	0.93	0.893	0.779	0.635	0.49	0.089
441	74	65.2	4.8	40.3	35	0.1163	0.0804	0.0477	0.4443	0.3643	0.0027	0.975	0.97	0.965	0.947	0.933	0.879	0.802	0.608	0.417	0.266	0.033
442	74	88.5	6.6	50.6	44	0.0987	0.0757	0.0011	0.4333	0.3467	0.003	0.978	0.973	0.968	0.957	0.949	0.918	0.872	0.736	0.574	0.422	0.064
443	74	91.2	6.7	54.9	48	0.1103	0.0834	0.0044	0.4395	0.3553	0.0027	0.978	0.973	0.969	0.96	0.953	0.927	0.887	0.767	0.619	0.474	0.087
444	74	78.1	5.8	21	19	0.1542	0.0389	0.4671	0.1976	0.1587	0.0025	0.972	0.965	0.949	0.886	0.835	0.667	0.481	0.2	0.074	0.03	0.003
445	74	87.2	6.4	54	48	0.0905	0.0736	0.0038	0.4674	0.3763	0.0024	0.978	0.972	0.967	0.956	0.948	0.922	0.883	0.767	0.621	0.474	0.079
446	74	138.1	10.2	76.8	68	0.1554	0.0681	0.0032	0.4218	0.3364	0.0027	0.98	0.974	0.97	0.963	0.959	0.945	0.925	0.868	0.786	0.688	0.246
447	74	61.9	4.6	23.7	22	0.3677	0.0544	0.1133	0.2759	0.2255	0.0026	0.973	0.969	0.96	0.921	0.886	0.756	0.591	0.283	0.109	0.041	0
448	74	197	14.6	104.7	93	0.216	0.0671	0.0013	0.4027	0.3226	0.0027	0.981	0.975	0.972	0.968	0.966	0.96	0.952	0.927	0.886	0.831	0.452
449	74	161.9	12	89.9	78	0.2278	0.0744	0.0152	0.4047	0.3274	0.0029	0.979	0.974	0.971	0.967	0.965	0.956	0.944	0.904	0.841	0.762	0.335
450	74	108.9	8.1	20.2	18	0.1166	0.0265	0.6191	0.1382	0.1122	0.002	0.971	0.964	0.946	0.876	0.821	0.644	0.454	0.179	0.064	0.027	0.002
451	74	71.5	5.3	44.4	39	0.1052	0.0796	0.0212	0.4515	0.3664	0.0027	0.976	0.971	0.966	0.952	0.942	0.901	0.84	0.674	0.491	0.334	0.04
452	74	89.4	6.6	51	45	0.1098	0.0754	0.0038	0.4325	0.3456	0.0028	0.978	0.973	0.969	0.958	0.95	0.922	0.879	0.748	0.588	0.433	0.063
453	74	87.8	6.5	51.9	46	0.1126	0.0806	0.0035	0.4352	0.3492	0.0028	0.978	0.973	0.968	0.957	0.95	0.922	0.879	0.753	0.598	0.446	0.069
454	74	192.1	14.2	128.4	113	0.1059	0.0798	0.0062	0.4847	0.4046	0.003	0.98	0.975	0.971	0.968	0.966	0.962	0.956	0.937	0.908	0.869	0.583
455	74	72.5	5.4	45.9	41	0.1546	0.0693	0.0103	0.4561	0.3732	0.0032	0.976	0.971	0.966	0.953	0.945	0.911	0.858	0.708	0.532	0.369	0.04

## Sheet: 3,337 Control Exome Metrics
CONTROL SUBJECT	1	2	3	4	5	6	7	8	9	10	11	12	13	14	15	16	17	18	19	20	21	22	23	24	25	26	27	28	29	30	31	32	33	34	35	36	37	38	39	40	41	42	43	44	45	46	47	48	49
Read Length:	92	91	74	74	50	92	92	50	50	92	92	72	72	50	50	72	72	50	50	74	72	50	50	72	72	91	92	74	92	92	50	76	74	92	91	50	50	50	50	74	74	74	72	72	50	50	50	50	74
Num reads (M):	95.1	117.2	95.1	79.2	89.1	103.4	100.5	170.6	142.8	84.3	82.1	78.6	83.3	166.8	143.5	106.2	108.4	97.1	90.7	114.4	88.9	174.8	144.1	155.4	111.4	74.2	68.4	82.4	213.3	197.8	194.6	83.1	104.6	167.7	182.4	82.7	100.7	213.9	158.5	86.5	90.6	67.6	89.7	94.7	118.4	85.6	99	98.7	86.7
Num bases (G):	8.7	10.7	7	5.9	4.5	9.5	9.2	8.5	7.1	7.7	7.5	5.7	6	8.3	7.2	7.6	7.8	4.9	4.5	8.5	6.4	8.7	7.2	11.2	8	6.8	6.3	6.1	19.5	18.2	9.7	6.3	7.7	15.4	16.7	4.1	5	10.7	7.9	6.4	6.7	5	6.5	6.8	5.9	4.3	4.9	4.9	6.4
Mean coverage:	53.5	63.7	99.4	82.2	52.1	60.4	55.5	101.2	86.3	48.4	46.8	79.7	82.7	99.3	82.3	87.8	93.7	56.3	53.8	122.3	94.3	100.6	87.4	160.2	116.4	46.1	39.1	83.8	109.1	94	116.2	78	103.4	82	87.3	50	58.7	127.4	94.9	89.9	91.3	68.6	94.1	95.2	64.2	51.1	58.3	57.7	98.8
Median coverage:	43	51	85	70	46	49	45	88	75	39	38	64	64	87	72	77	82	49	47	108	75	88	76	132	96	37	32	72	91	79	101	66	91	68	72	44	51	104	79	77	78	59	79	80	57	45	51	50	86
PCR duplicates:	0.0824	0.0855	0.0526	0.0446	0.0289	0.0911	0.0863	0.0627	0.0408	0.071	0.0681	0.0651	0.0704	0.0511	0.0505	0.0509	0.0506	0.0332	0.0453	0.0694	0.0427	0.0545	0.0548	0.0952	0.0516	0.0708	0.0654	0.0433	0.1466	0.1359	0.0584	0.0357	0.0692	0.1436	0.1498	0.032	0.0394	0.1064	0.0705	0.0489	0.049	0.0772	0.0497	0.059	0.0477	0.0398	0.0385	0.036	0.0291
Multiply mapped:	0.059	0.0565	0.0621	0.0614	0.0648	0.0591	0.0569	0.046	0.0439	0.0587	0.0556	0.0541	0.0511	0.0462	0.0445	0.0617	0.0544	0.0657	0.0613	0.0679	0.0561	0.0466	0.0423	0.0631	0.0598	0.0592	0.0549	0.0606	0.0565	0.0538	0.0451	0.0382	0.0596	0.0559	0.0546	0.0641	0.0634	0.0438	0.0429	0.0629	0.0598	0.053	0.056	0.0555	0.0643	0.0624	0.0643	0.0618	0.0684
Unmapped:	0.0012	0.0012	0.0025	0.0025	0.0035	0.0013	0.0012	0.0393	0.0386	0.0016	0.0014	0.0014	0.0038	0.0379	0.0389	0.0614	0.0625	0.0035	0.0032	0.0046	0.0007	0.0434	0.0381	0.0005	0.0005	0.0016	0.0018	0.0021	0.0024	0.0025	0.0496	0.0397	0.001	0.0027	0.0025	0.0038	0.0035	0.052	0.0435	0.0015	0.0017	0.0089	0.0003	0.0003	0.0056	0.0037	0.0031	0.0031	0.0034
Reads on-target:	0.3241	0.3193	0.7148	0.7246	0.6075	0.3358	0.3253	0.5969	0.6202	0.3317	0.3361	0.7392	0.7398	0.5977	0.5911	0.6002	0.6337	0.5892	0.6151	0.7199	0.7632	0.5791	0.6224	0.7105	0.74	0.3558	0.3374	0.7127	0.2969	0.2837	0.5999	0.6543	0.6936	0.2859	0.2844	0.6142	0.6049	0.5939	0.6129	0.7099	0.7039	0.7245	0.7498	0.7364	0.5513	0.6194	0.5996	0.607	0.7555
Bases on-target:	0.2677	0.2646	0.6144	0.6229	0.5189	0.2771	0.2674	0.5175	0.5387	0.2718	0.2759	0.6138	0.6145	0.519	0.5115	0.5001	0.5346	0.5042	0.5261	0.6282	0.6565	0.5016	0.5411	0.6238	0.6464	0.2957	0.2771	0.6107	0.243	0.23	0.5207	0.5513	0.5931	0.2321	0.2331	0.5259	0.5178	0.5198	0.5346	0.6107	0.6051	0.5966	0.6353	0.6221	0.4715	0.5298	0.5122	0.5189	0.6691
Mean error rate:	0.0043	0.0043	0.0057	0.0055	0.0037	0.0037	0.0037	0.0035	0.0038	0.0038	0.0037	0.009	0.008	0.0035	0.0035	0.0074	0.0072	0.0036	0.0036	0.0074	0.0048	0.0041	0.0035	0.0095	0.0093	0.0033	0.0033	0.0041	0.0047	0.0047	0.0043	0.0063	0.0039	0.0048	0.0048	0.0038	0.0034	0.0042	0.0035	0.003	0.003	0.0138	0.004	0.0037	0.0039	0.0037	0.0035	0.0034	0.0027
1x target base coverage:	0.985	0.986	0.988	0.986	0.989	0.985	0.985	0.986	0.986	0.984	0.985	0.971	0.974	0.987	0.986	0.981	0.982	0.989	0.988	0.984	0.976	0.986	0.986	0.982	0.98	0.984	0.984	0.987	0.989	0.989	0.987	0.983	0.989	0.987	0.989	0.989	0.989	0.984	0.982	0.988	0.988	0.969	0.978	0.979	0.989	0.988	0.989	0.989	0.984
2x target base coverage:	0.979	0.981	0.983	0.981	0.983	0.98	0.98	0.981	0.982	0.978	0.979	0.962	0.966	0.982	0.98	0.975	0.976	0.983	0.982	0.981	0.967	0.982	0.98	0.977	0.974	0.977	0.976	0.982	0.985	0.986	0.982	0.977	0.986	0.983	0.985	0.983	0.984	0.978	0.975	0.983	0.983	0.959	0.971	0.971	0.984	0.982	0.984	0.983	0.98
4x target base coverage:	0.966	0.971	0.976	0.972	0.973	0.969	0.968	0.974	0.974	0.965	0.965	0.946	0.951	0.975	0.972	0.967	0.968	0.973	0.972	0.975	0.954	0.974	0.972	0.968	0.963	0.962	0.959	0.974	0.979	0.979	0.975	0.968	0.98	0.976	0.978	0.973	0.975	0.969	0.965	0.976	0.975	0.942	0.959	0.96	0.975	0.972	0.974	0.973	0.973
8x target base coverage:	0.937	0.947	0.963	0.956	0.95	0.944	0.942	0.962	0.961	0.935	0.932	0.919	0.924	0.963	0.957	0.952	0.954	0.95	0.947	0.965	0.931	0.963	0.958	0.954	0.945	0.926	0.915	0.958	0.967	0.966	0.964	0.95	0.969	0.961	0.964	0.948	0.955	0.954	0.946	0.961	0.961	0.912	0.939	0.94	0.956	0.948	0.952	0.95	0.961
10x target base coverage:	0.92	0.934	0.956	0.948	0.936	0.93	0.926	0.956	0.954	0.916	0.913	0.905	0.911	0.957	0.95	0.945	0.946	0.936	0.933	0.961	0.92	0.957	0.951	0.948	0.936	0.904	0.889	0.95	0.96	0.96	0.958	0.941	0.964	0.952	0.956	0.934	0.943	0.947	0.937	0.954	0.953	0.897	0.929	0.931	0.945	0.934	0.94	0.937	0.956
15x target base coverage:	0.869	0.895	0.938	0.924	0.893	0.889	0.88	0.941	0.936	0.861	0.854	0.87	0.876	0.941	0.929	0.925	0.927	0.895	0.89	0.95	0.89	0.941	0.932	0.931	0.913	0.841	0.811	0.928	0.943	0.941	0.944	0.915	0.949	0.929	0.934	0.888	0.907	0.929	0.912	0.933	0.933	0.859	0.903	0.906	0.912	0.89	0.902	0.896	0.939
20x target base coverage:	0.81	0.849	0.917	0.896	0.839	0.84	0.826	0.923	0.914	0.794	0.784	0.833	0.839	0.924	0.904	0.902	0.904	0.845	0.836	0.937	0.859	0.924	0.91	0.915	0.888	0.768	0.72	0.902	0.924	0.92	0.929	0.885	0.933	0.901	0.908	0.83	0.862	0.91	0.884	0.909	0.909	0.819	0.875	0.879	0.874	0.837	0.855	0.846	0.921
30x target base coverage:	0.675	0.741	0.866	0.828	0.713	0.726	0.698	0.879	0.859	0.644	0.628	0.757	0.762	0.879	0.843	0.846	0.851	0.729	0.715	0.907	0.794	0.88	0.854	0.879	0.836	0.61	0.535	0.837	0.879	0.866	0.893	0.812	0.891	0.832	0.845	0.695	0.754	0.867	0.822	0.85	0.85	0.736	0.815	0.82	0.78	0.709	0.744	0.732	0.874
40x target base coverage:	0.541	0.625	0.805	0.749	0.58	0.605	0.567	0.825	0.79	0.497	0.478	0.68	0.683	0.823	0.768	0.779	0.789	0.609	0.589	0.869	0.728	0.825	0.785	0.841	0.783	0.463	0.378	0.761	0.824	0.8	0.849	0.728	0.838	0.75	0.768	0.555	0.635	0.819	0.756	0.779	0.781	0.654	0.751	0.758	0.676	0.574	0.626	0.614	0.816
50x target base coverage:	0.423	0.515	0.738	0.665	0.454	0.491	0.448	0.763	0.711	0.373	0.354	0.604	0.605	0.759	0.686	0.705	0.722	0.493	0.469	0.824	0.662	0.763	0.709	0.802	0.729	0.344	0.262	0.68	0.763	0.726	0.797	0.641	0.777	0.662	0.685	0.427	0.519	0.769	0.69	0.704	0.707	0.572	0.686	0.694	0.571	0.446	0.513	0.501	0.751
100x target base coverage:	0.116	0.173	0.414	0.31	0.095	0.154	0.124	0.43	0.331	0.086	0.079	0.293	0.298	0.418	0.305	0.347	0.392	0.129	0.11	0.547	0.373	0.425	0.341	0.611	0.483	0.079	0.048	0.321	0.45	0.369	0.508	0.277	0.445	0.29	0.321	0.084	0.141	0.521	0.389	0.358	0.367	0.235	0.382	0.389	0.182	0.087	0.141	0.14	0.418
[truncated: 3,288 more columns]
