# Supplementary material for: Two locus inheritance of non-syndromic midline craniosynostosis via rare SMAD6 and common BMP2 alleles
Source: eLife. 2016 Sep 8;5:e20125. doi: 10.7554/eLife.20125 (PMC5045293; doi:10.7554/eLife.20125)
Supplement: Table 1—source data 1. — Mutations highlighted in orange are likely loss of function mutations, those highlighted in blue are likely damaging missense mutations (D-mis) as called by MetaSVM, and those without highlight are predicted to be tolerated (T-mis) or are synonymous (syn). DOI: http://dx.doi.org/10.7554/eLife.20125.005 [file elife-20125-table1-data1.xlsx]

## Sheet: Sheet1
Table 1- Source Data 1. De novo mutations in 132 trios with sagittal and/or metopic craniosynostosis.
Mutations highlighted in orange are likely loss of function mutations, those highlighted in blue are likely damaging missense mutations (D-mis) as called by MetaSVM, and those without highlight are predicted to be tolerated (T-mis) or are synonymous (syn).
Type of craniosynostosis	Gene	Protein Impact	Mutation Class	ExAC03 Frequency	RefSeqNM Accession
Sagittal	NAA25	p.F359fs*26	frameshift	Novel	NM_024953
Sagittal	NME5	p.I153fs*9	frameshift	Novel	NM_003551
Sagittal+Metopic	SMAD6	p.Q78fs*41	frameshift	Novel	NM_005585
Sagittal	SPRY1	p.Q6fs*8	frameshift	Novel	NM_001258039
Metopic	ZCCHC11	E1275fs*42	frameshift	Novel	NM_001009881
Sagittal	DCAF13	p.R518*	nonsense	8.29e-06	NM_015420
Sagittal	GPRC5A	p.R272*	nonsense	3.31e-05	NM_003979
Sagittal	KIAA1211	p.G17*	nonsense	Novel	NM_020722
Sagittal	MESP1	p.E104*	nonsense	8.92e-05	NM_018670
Sagittal	SMAD6	p.E374*	nonsense	Novel	NM_005585
Sagittal	SPRY4	p.E160*	nonsense	Novel	NM_001127496
Metopic	DUS3L	exon9:c.760+1G>A	splice	Novel	NM_001161619
Sagittal	TTC12	exon20:c.1816+1G>C	splice	Novel	NM_017868
Metopic	ABCC5	p.Y700D	D-mis	Novel	NM_005688
Sagittal	ACADM	p.A103T	D-mis	Novel	NM_001286044
Sagittal	AGAP3	p.R185W	D-mis	8.37e-06	NM_001281300
Sagittal	ASB5	p.H238L	D-mis	Novel	NM_080874
Metopic	CACNA1H	p.A1851D	D-mis	Novel	NM_001005407
Sagittal	CATSPER4	p.I289V	D-mis	Novel	NM_198137
Sagittal	CCBL2	p.G260D	D-mis	Novel	NM_001008662
Sagittal	COL11A1	p.G1034S	D-mis	1.71e-05	NM_080630
Sagittal	CSF2RB	p.G635W	D-mis	Novel	NM_000395
Sagittal	EDEM1	p.D188N	D-mis	Novel	NM_014674
Sagittal	H2AFV	p.A6P	D-mis	Novel	NM_012412
Sagittal	HELZ2	p.R120H	D-mis	9.14e-06	NM_033405
Sagittal	IVD	p.R53H	D-mis	8.24e-06	NM_002225
Metopic	KCNH3	p.T53M	D-mis	Novel	NM_012284
Sagittal	MARCO	p.K201T	D-mis	Novel	NM_006770
Metopic	PEPD	p.G326R	D-mis	Novel	NM_001166056
Sagittal	RASAL2	p.R571P	D-mis	Novel	NM_004841
Metopic	RCCD1	p.G218E	D-mis	8.4e-06	NM_001017919
Sagittal	SI	p.I1329V	D-mis	Novel	NM_001041
Metopic	SLC12A6	p.R724W	D-mis	1.65e-05	NM_001042497
Metopic	SLC2A14	p.V120F	D-mis	Novel	NM_001286237
Sagittal	SLC4A3	p.R553C	D-mis	Novel	NM_005070
Metopic	SMAD6	p.G390C	D-mis	Novel	NM_005585
Metopic	SMURF1	p.R468W	D-mis	Novel	NM_001199847
Sagittal	TBCB	p.R30G	D-mis	Novel	NM_001281
Sagittal	TENM2	p.R1813H	D-mis	Novel	NM_001122679
Sagittal	THBS1	p.R980C	D-mis	8.47e-06	NM_003246
Metopic	TSC1	p.H661R	D-mis	Novel	NM_001162427
Metopic	ADGRL3	p.L575R	T-mis	Novel	NM_015236
Sagittal	ADH1A	p.V293I	T-mis	0.0002	NM_000667
Sagittal	AFAP1L2	p.Q480L	T-mis	Novel	NM_001001936
Sagittal	ARHGAP33	p.C179Y	T-mis	Novel	NM_001172630
Sagittal	ARMC6	p.P359S	T-mis	Novel	NM_033415
Metopic	BAZ2A	p.T1151S	T-mis	Novel	NM_001300905
Sagittal	BIVM,BIVM-ERCC5	p.A72T	T-mis	Novel	NM_001159596
Metopic	C1orf141	p.L161V	T-mis	Novel	NM_001276351
Sagittal	C1orf95	p.L60V	T-mis	Novel	NM_001003665
Metopic	C1RL	p.S54Y	T-mis	Novel	NM_001297640
Metopic	C22orf23	p.T43M	T-mis	2.47e-05	NM_032561
Sagittal	CALD1	p.P503L	T-mis	0.001	NM_033140
Metopic	CBX4	p.V505A	T-mis	0.001	NM_003655
Metopic	CBX7	p.R159H	T-mis	1.03e-05	NM_175709
Metopic	CGNL1	p.A484V	T-mis	1.65e-05	NM_032866
Sagittal	CHCHD4	p.P33R	T-mis	Novel	NM_001098502
Sagittal	CRHR2	p.D109N	T-mis	Novel	NM_001202482
Sagittal	DECR2	p.R50Q	T-mis	2.48e-05	NM_020664
Sagittal	DMBT1	p.Q1290R	T-mis	8.28e-06	NM_004406
Sagittal	DMXL2	p.C1452R	T-mis	Novel	NM_001174117
Sagittal	DNAH11	p.P959L	T-mis	Novel	NM_001277115
Metopic	DOCK2	p.K636Q	T-mis	Novel	NM_004946
Sagittal	DOCK8	p.T1843I	T-mis	9.88e-05	NM_001190458
Sagittal+Metopic	DONSON	p.S551P	T-mis	Novel	NM_017613
Sagittal	DUSP5	p.R214W	T-mis	4.12e-05	NM_004419
Metopic	EP300	p.Q1043H	T-mis	Novel	NM_001429
Sagittal	FGG	p.K328R	T-mis	Novel	NM_000509
Sagittal+Metopic	FOXM1	p.N331Y	T-mis	Novel	NM_001243088
Sagittal	GGT7	p.A178S	T-mis	Novel	NM_178026
Sagittal	GOLGB1	p.E3052G	T-mis	Novel	NM_001256488
Metopic	GPR137C	p.C89S	T-mis	Novel	NM_001099652
Sagittal	GRIN2A	p.K1339E	T-mis	1.65e-05	NM_001134407
Sagittal	HIST1H3A	p.R135K	T-mis	Novel	NM_003529
Sagittal	IPO8	p.Q14L	T-mis	Novel	NM_001190995
Metopic	KDM4E	p.R455C	T-mis	Novel	NM_001161630
Metopic	KIAA1549	p.R1603W	T-mis	0.0003	NM_001164665
Sagittal	KIF17	p.A57V	T-mis	Novel	NM_001122819
Sagittal	KSR2	p.R459H	T-mis	Novel	NM_173598
Metopic	LRIT1	p.G421R	T-mis	Novel	NM_015613
Sagittal	MAP3K8	p.E58G	T-mis	Novel	NM_001244134
Sagittal	MCM6	p.M631V	T-mis	Novel	NM_005915
Metopic	MUC13	p.G37C	T-mis	Novel	NM_033049
Sagittal	NCOR2	p.E1129G	T-mis	Novel	NM_001077261
Sagittal	NEURL4	p.E925K	T-mis	Novel	NM_001005408
Metopic	NR1D1	p.V393M	T-mis	4.46e-05	NM_021724
Sagittal	NUAK1	p.P557S	T-mis	Novel	NM_014840
Sagittal	OTOGL	p.E1713K	T-mis	Novel	NM_173591
Sagittal	PHACTR4	p.R631H	T-mis	Novel	NM_023923
Sagittal	PKD1L1	p.A1650P	T-mis	Novel	NM_138295
Metopic	PLA2G3	p.A64V	T-mis	5.01e-05	NM_015715
Metopic	PRDM15	p.H459D	T-mis	Novel	NM_001040424
Metopic	PSMB10	p.M185T	T-mis	Novel	NM_002801
Metopic	PWWP2A	p.P287L	T-mis	Novel	NM_001130864
Sagittal+Metopic	QTRTD1	p.A298E	T-mis	Novel	NM_001256836
Metopic	RGS3	p.N5S	T-mis	4.1e-05	NM_001276261
Sagittal	RPS6KA4	p.Q604H	T-mis	Novel	NM_001006944
Metopic	RPUSD2	p.S178F	T-mis	Novel	NM_001286407
Sagittal	RTL1	p.R1184Q	T-mis	0.0001	NM_001134888
Sagittal	RUFY1	p.Q38P	T-mis	Novel	NM_001040451
Sagittal	SCEL	p.D329G	T-mis	Novel	NM_001160706
Metopic	SEZ6	p.P857L	T-mis	Novel	NM_001098635
Sagittal	SGK2	p.K99R	T-mis	Novel	NM_016276
Sagittal	SGPL1	p.D553N	T-mis	4.94e-05	NM_003901
Sagittal	SNX15	p.R124W	T-mis	1.66e-05	NM_013306
Sagittal	SPAG6	p.I280T	T-mis	Novel	NM_001253855
Sagittal+Metopic	SPG11	p.F2230L	T-mis	Novel	NM_001160227
Sagittal	SPTBN4	p.R256W	T-mis	8.28e-06	NM_020971
Metopic	STAP2	p.G186S	T-mis	0.0001	NM_001013841
Sagittal	TEX15	p.C1374F	T-mis	Novel	NM_031271
Sagittal	THRAP3	p.R899W	T-mis	8.28e-05	NM_005119
Sagittal	TIFA	p.Y122C	T-mis	Novel	NM_052864
Metopic	TSPYL1	p.L13F	T-mis	Novel	NM_003309
Sagittal	TTN	p.T19373S	T-mis	Novel	NM_003319
Sagittal	TTN	p.I3580M	T-mis	Novel	NM_133378
Metopic	UGT2B10	p.P154L	T-mis	Novel	NM_001075
Metopic	USP20	p.R376Q	T-mis	1.81e-05	NM_001008563
Sagittal+Metopic	WFIKKN1	p.P412R	T-mis	Novel	NM_053284
Metopic	YWHAH	p.A189S	T-mis	Novel	NM_003405
Metopic	ZNF292	p.R771Q	T-mis	Novel	NM_015021
Metopic	ZNF517	p.R309C	T-mis	1.98e-05	NM_213605
Sagittal	ZNF638	p.M515I	T-mis	Novel	NM_001014972
Sagittal	ZNF836	p.K629N	T-mis	Novel	NM_001102657
Sagittal	ARFGEF2	p.T1286T	syn	4.11e-05	NM_006420
Metopic	BMPER	p.Y635Y	syn	4.12e-05	NM_133468
Metopic	COMMD5	p.L59L	syn	Novel	NM_001081003
Metopic	DMBT1	p.F1683F	syn	Novel	NM_004406
Metopic	GAK	p.R1171R	syn	0.0001	NM_001286833
Metopic	GTSE1	p.A240A	syn	Novel	NM_016426
Sagittal	HS6ST3	p.E93E	syn	Novel	NM_153456
Sagittal	IDI2	p.S71S	syn	8.24e-06	NM_033261
Sagittal	KIF22	p.E399E	syn	Novel	NM_001256270
Sagittal	KLHL26	p.D135D	syn	Novel	NM_018316
Sagittal	MAMDC2	p.A316A	syn	Novel	NM_153267
Sagittal	MUC17	p.L3429L	syn	Novel	NM_001040105
Sagittal	MYOM1	p.L1511L	syn	Novel	NM_019856
Metopic	NFKBIA	p.R7R	syn	Novel	NM_020529
Sagittal	NLGN2	p.G357G	syn	8.25e-06	NM_020795
Metopic	NPHS1	p.G394G	syn	Novel	NM_004646
Metopic	RIF1	p.S235S	syn	Novel	NM_001177665
Metopic	RTN4RL1	p.I66I	syn	Novel	NM_178568
Sagittal	SYNE1	p.L5901L	syn	Novel	NM_033071
Metopic	VPS13B	p.E2529E	syn	Novel	NM_017890
Sagittal+Metopic	ZFC3H1	p.A1391A	syn	9.95e-05	NM_144982
